# Supplementary material
Source: PubMed Central journal article supplement (PMC3421220)
Supplement: 1210906109_sapp.pdf [file 1210906109_sapp.pdf]

Supporting Information for  
**A microRNA Network Regulates Expression  
and Biosynthesis of CFTR and CFTR- $\Delta$ F508**

Shyam Ramachandran<sup>a,b</sup>, Philip H. Karp<sup>c</sup>, Peng Jiang<sup>c</sup>, Lynda S. Ostedgaard<sup>c</sup>, Amy E. Walz<sup>a</sup>, John T. Fisher<sup>e</sup>, Shaf Keshavjee<sup>h</sup>, Kim A. Lennox<sup>i</sup>, Ashley M. Jacobi<sup>i</sup>, Scott D. Rose<sup>i</sup>, Mark A. Behlke<sup>i</sup>, Michael J. Welsh<sup>b,c,d,g</sup>, Yi Xing<sup>b,c,f</sup>, Paul B. McCray Jr.<sup>a,b,c</sup>

Author Affiliations: Department of Pediatrics<sup>a</sup>, Interdisciplinary Program in Genetics<sup>b</sup>, Departments of Internal Medicine<sup>c</sup>, Molecular Physiology and Biophysics<sup>d</sup>, Anatomy and Cell Biology<sup>e</sup>, Biomedical Engineering<sup>f</sup>, Howard Hughes Medical Institute<sup>g</sup>, Carver College of Medicine, University of Iowa, Iowa City, IA-52242

Division of Thoracic Surgery<sup>h</sup>, Toronto General Hospital, University Health Network, University of Toronto, Toronto, Canada-M5G 2C4

Integrated DNA Technologies<sup>i</sup>, Coralville, IA-52241

To whom correspondence should be addressed: Email: [michael-welsh@uiowa.edu](mailto:michael-welsh@uiowa.edu) (M.J.W.); [yi-xing@uiowa.edu](mailto:yi-xing@uiowa.edu) (Y.X.); Email: [paul-mccray@uiowa.edu](mailto:paul-mccray@uiowa.edu) (P.B.M.)

**This PDF file includes:**

Materials and Methods

References

- Fig. S1. miR-138 regulates SIN3A in a dose-dependent and site-specific manner.
- Fig. S2. miR-138 regulates endogenous SIN3A protein expression.
- Fig. S3. miR-138 regulates endogenous CFTR protein expression in Calu-3 cells.
- Fig. S4. miR-138 regulates endogenous CFTR protein expression in primary human airway epithelia.
- Fig. S5. miR-138 regulates CFTR expression in HeLa cells.
- Fig. S6. miR-138 regulates CFTR expression in HEK293T cells.
- Fig. S7. HeLa cells exhibit CFTR channel activity.
- Fig. S8. miR-138 improves CFTR processing.
- Fig. S9. miR-138 improves CFTR- $\Delta$ F508 processing.
- Fig. S10. SIN3A inhibition yields partial rescue of Cl<sup>-</sup> transport in CF epithelia.
- Fig. S11. miR-138 regulates endogenous CFTR and SIN3A expression in CF primary airway epithelia.
- Fig. S12. SIN3A inhibition yields partial rescue of Cl<sup>-</sup> transport in CF epithelia.
- Fig. S13. miR-138 regulates endogenous CFTR and SIN3A expression in CFBE cells.
- Fig. S14. Oligonucleotide transfection does not cause decrease in cell viability
- Fig. S15. Specificity of oligonucleotide transfections.
- Fig. S16. Persistence of oligonucleotide effects 2 weeks post-transfection.

Fig. S17. Epistatic relationship between SIN3A and miR-138.

Table S1. Expression of microRNAs in human airway epithelia

Table S2. CFTR-Associated Gene Network

Table S3. Enrichment significance for genes influencing CFTR biogenesis

Table S4. Genes in the CFTR-Associated Gene Network identified as differentially expressed in Calu-3 cells following miR-138 or SIN3A DsiRNA treatment

Table S5. Gene Ontology enrichment of genes co-regulated in Calu-3 cells following miR-138 mimic or SIN3A DsiRNA treatment

## MATERIALS AND METHODS

**Primary Human airway epithelia:** Airway epithelia from human trachea and primary bronchus removed from organs donated for research were cultured at the air-liquid interface (ALI) (1). These studies were approved by the Institutional Review Board of the University of Iowa. Briefly, airway epithelial cells were dissociated from native tissue by pronase enzyme digestion. Permeable membrane inserts (0.6 cm<sup>2</sup> Millipore-PCF, 0.33 cm<sup>2</sup> Costar-Polyester) pre-coated with human placental collagen (IV, Sigma) were seeded with freshly dissociated epithelia. Seeding culture media used was DMEM/F-12 medium supplemented with 5% FBS, 50 units/mL penicillin, 50 µg/mL streptomycin, 50 µg/mL gentamicin, 2 µg/mL fluconazole, and 1.25 µg/mL amphotericin B. For epithelia from cystic fibrosis (CF) patients, the following additional antibiotics were used for the first 5 days: 77 µg/mL ceftazidime, 12.5 µg/mL imipenem and cilastatin, 80 µg/mL tobramycin, 25 µg/mL piperacillin and tazobactam. After seeding, the cultures were maintained in DMEM/F-12 medium supplemented with 2% Ultrosor G (USG, Pall Biosepra) and the above listed antibiotics.

**RNA isolation:** Total RNA from human primary airway epithelial cultures, and cell lines (Calu-3, HEK293T, HeLa, CFBE) was isolated using the *mirVana*<sup>TM</sup> miRNA isolation kit (Ambion) (2). Total RNA was tested on an Agilent Model 2100 Bioanalyzer (Agilent Technologies). Only samples with an RNA integrity number (RIN) over 7.0 were selected for downstream processing.

**TaqMan Low Density microRNA Array (TLDA):** Global microRNA (miRNA) expression profiling was performed using the TaqMan<sup>®</sup> Human MicroRNA Array Set v2.0 (Applied Biosystems), which screens for the expression of 667 human miRNAs plus endogenous controls. Total RNA was isolated from primary cultures (a minimum of 30 days post-seeding) from 4 human non-CF donors, reverse transcribed using the Megaplex<sup>TM</sup> RT primers, Human Pool Set v2.0 (Applied Biosystems), and quantitated on an Applied Biosystems 7900 HT Real-Time PCR system. The TLDA data were processed using the accompanying software RQ Manager (Applied Biosystems). For each sample, the normalization factor was calculated as a mean of the two endogenous controls, RNU44 and RNU48.  $\Delta C_q$  was calculated for each miRNA as ( $C_q(\text{miRNA})$ -normalization factor). All protocols followed were as per the manufacturer's recommendation.

**Oligonucleotide Transfections:** Freshly dissociated human airway epithelial cells or immortalized cell lines were transfected in pre-coated 96 well plates (Costar) or Transwell<sup>TM</sup> Permeable Supports (0.33 cm<sup>2</sup> 0.4 µm polyester membrane, Costar 3470). Lipofectamine<sup>TM</sup> RNAiMAX (Invitrogen) was used as a reverse transfection reagent. Pre-coated (with human placental collagen Type IV, Sigma) substrates were incubated with the transfection mix comprising of Opti-MEM (Invitrogen), oligonucleotide (Integrated DNA Technologies) and Lipofectamine<sup>TM</sup> RNAiMAX (Invitrogen). 15-20 minutes later, 200,000 freshly dissociated cells suspended in DMEM/F-12 were added to each well/insert. Between 4-6 hrs later, all media from

the apical surface was aspirated and complete media added to the basolateral surface. Media on the basolateral surface were changed every 3-4 days. For human primary epithelial cultures, USG media described above was used. For cultures from immortalized cell lines: Calu-3, CFBE41o- (termed CFBE throughout (3)), complete media specific to each cell line was used (Calu-3: MEM (Gibco) + 10% FBS (Atlanta Biologicals) + 1% Pen Strep (Gibco); CFBE: Advanced DMEM (Gibco) + 1% L-Glutamine (Gibco) + 10% FBS (Atlanta Biologicals) + 1% Pen Strep (Gibco)).

**Oligonucleotide reagents:** The DsiRNAs were designed (4, 5), synthesized and validated (6, 7) by Integrated DNA Technologies. The miRNA-mimic (6, 8) and anti-miRNA(9, 10) were also designed and synthesized by Integrated DNA Technologies. All accompanying control sequences (Scr) were also generated by Integrated DNA Technologies.

r = RNA

m = 2'OMe modification

SS = Sense strand

AS = Antisense strand

\* = Phosphorothioate linkages

+ = Locked Nucleic Acid modification

SpC3 = C3 Spacer modification

**SIN3A DsiRNA**

Sense strand sequence: /5Phos/rGrCrGrArUrArCrArUrGrArArUrUrCrArGrArUrArCrUrACC

Antisense strand sequence:

/5Phos/rGrGrUrArGrUrArUrCrUmGrAmArUrUrCrArUrGrUmArUmCrGmCmUmC

**CFTR DsiRNA**

Sense strand sequence: /5Phos/rGrGrArArGrArArUrUrCrUrArUrUrCrUrCrArArUrCrCrAAT

Antisense strand sequence:

/5Phos/rArUrUrGrGrArUrUrGrAmGrAmArUrArGrArArUrUmCrUmUrCmCmUmU

**Scr (Negative control for DsiRNAs)**

Sense strand sequence: /5Phos/rCrGrUrUrArArUrCrGrCrGrUrArUrArArUrArCrGrCrGrUAT

Antisense strand sequence:

/5Phos/rArUrArCrGrCrGrUrArUmUrAmUrArCrGrCrGrArUmUrAmArCmGmAmC

**miR-138 anti-miRNA**

mC\*mG\*+G\* mCmC+T mGmA+T mUmC+A mCmA+A mCmA+C mCmA\*+G\* mC\*mU

**Scr (negative control for anti-miRNA)**

mG\*mC\*+G\* mU\*mA\*+T\* mU\*mA\*+T\* mA\*mG\*+C\* mC\*mG\*+A\* mU\*mU\*+A\*

mA\*mC\*+G\* mA

**miR-138 mimic**

Sense strand sequence: /5SpC3/rCmG rGmC/iSpC3/ mUrGmA rUmUrC mArCmA rAmCrA mCrCmA rGmCrU

Antisense strand sequence: /5Phos/rArG rCrUrG rGrUrG rUrUrG rUrGrA rArUrC rArGrG mCmCmG

**Specificity of oligonucleotide transfections:** To ascertain the specificity of the following oligonucleotides: CFTR DsiRNA, SIN3A DsiRNA, miR-138 mimic, and miR-138 anti-miRNA, we harvested RNA from cells transfected with these oligonucleotides and measured the expression of multiple genes and miRNAs (SI Fig. S15). 24 hrs post-transfection, RNA was harvested from each sample and subjected to quantitative RT-PCR for the following genes: SFRS9 (normalizer for mRNA), GAPDH, HPRT, RNU48 (normalizer for miRNAs), miRs-21, -24, -26a, -200c, -146a, -146b, -27a\*, -134.

**Quantitative RT-PCR (RT-qPCR):** First-strand cDNA was synthesized using SuperScript® II (Invitrogen), and oligo-dT and random-hexamer primers. Sequence specific PrimeTime® qPCR Assays for human CFTR, SIN3A, GAPDH, HPRT, and SFRS9 were designed and validated (Integrated DNA Technologies). To quantitate miRNAs, TaqMan® microRNA Assays (Applied Biosystems) were obtained for miR-138, RNU48 (control) and 8 other miRNAs (negative control, miRs-21, -24, -26a, -200c, -146a, -146b, -27a\*, -134). All reactions were setup using TaqMan® Fast Universal PCR Master Mix (Applied Biosystems) and run on the Applied Biosystems 7900 HT Real-Time PCR system. All experiments were performed in quadruplicate. mRNA and miRNA quantification in cell lines represents 8 independent transfections in 4 separate experiments. mRNA quantification in human primary airway epithelial cultures represent 8 independent transfections in 8 non-CF donors and 4 CF donors.

/56-FAM/: single isomer 6-carboxyfluorescein

/3IABkFQ/: Iowa Black FQ = dark quencher

**CFTR:**

Forward- CAACATCTAGTGAGCAGTCAGG

Reverse- CCCAGGTAAGGGATGTATTGTG

Probe- /56-FAM/TCCAGATCCTGGAAATCAGGGTTAGT/3IABkFQ/

**SIN3A:**

Forward- GCACAGAAACCAGTATTTCTCCC

Reverse- GGTCTTCTTGCTGTTTCCTTCC

Probe- /56-FAM/TGCTCTCGACCACGTTGACACTTCC/3IABkFQ/

**GAPDH:**

Forward- GGCATGGCCTTCCGTGT

Reverse- GCCCAGGATGCCCTTGAG

Probe- /56-FAM/CCTGCTTCACCACCTTCTTGATGTCATCAT/3IABkFQ/

**HPRT:**

Forward- GACTTTGCTTTCCTTGGTCAG

Reverse- GGCTTATATCCAACACTTCGTGGG

Probe- /56-FAM/ATGGTCAAGGTCGCAAGCTTGCTGGT/3IABkFQ/

**SFRS9:**

Forward- TGTGCAGAAGGATGGAGT

Reverse- CTGGTGCTTCTCTCAGGATA

Probe- /56-FAM/TGGAATATGCCCTGCGTAAACTGGA/3IABkFQ/

**Primers to distinguish between endogenous CFTR and transgene CFTR-HA:**

Endogenous CFTR: Forward- AGTGGAGGAAAGCCTTTGGAGT

Endogenous CFTR: Reverse- ACAGATCTGAGCCCAACCTCA

CFTR-HA: Forward- CCCATATGATGTGCCTGATT

CFTR-HA: Reverse- GTCGGCTACTCCCACGTAAA

**Electrophysiology studies:** Transepithelial Cl<sup>-</sup> current measurements were made in Ussing chambers about 2 weeks post-seeding (11). Briefly, primary cultures were mounted in Ussing chambers (EasyMount P2300 chamber system, Physiologic Instruments, San Diego, CA) and voltage clamped (model VCCMC8-4S, Physiologic Instruments), and connected to a computerized data acquisition system (Acquire & Analyze 2.3.181, Physiologic Instruments) to record short-circuit currents and transepithelial resistance. Transepithelial Cl<sup>-</sup> current was measured under short-circuit current conditions. Cultures were incubated overnight with 10 μM forskolin and 100 μM 3-isobutyl-1-methylxanthine (IBMX). After measuring baseline current,

the transepithelial current ( $I_t$ ) response to sequential apical addition of 100  $\mu$ M amiloride (Amil), 100  $\mu$ M 4,4'-diisothiocyanato-stilbene-2,2'-disulfonic acid (DIDS), 4.8 mM  $[Cl^-]$ , 10  $\mu$ M forskolin and 100  $\mu$ M 3-isobutyl-1-methylxanthine (IBMX), and 100  $\mu$ M GlyH-101 was measured. Studies were conducted with a  $Cl^-$  concentration gradient containing 135 mM NaCl, 1.2 mM  $MgCl_2$ , 1.2 mM  $CaCl_2$ , 2.4 mM  $K_2PO_4$ , 0.6 mM  $KH_2PO_4$ , 5 mM dextrose, and 5 mM HEPES (pH 7.4) on the basolateral surface, and gluconate substituted for  $Cl^-$  on the apical side. Transepithelial current measurements were made in 24 Calu-3 ALI cultures, 6 each from four independent experiments, pre-transfected with reagents noted; 3 ALI cultures per condition in human primary airway epithelial cultures (*CFTR* Q493X/S912X); 8 ALI cultures per condition in human primary airway epithelia donors (wild-type *CFTR*, *CFTR*  $\Delta F508/\Delta F508$ , *CFTR*  $\Delta F508/3659DC$ , *CFTR*  $\Delta F508/R1162X$ ). To confirm that the effects of oligonucleotide transfections persisted at the time of conducting the Ussing chamber studies, RT-qPCR and immunoblots measuring SIN3A and CFTR expression in Calu-3 cells (SI Fig. S16A, B) and CFBE cells (SI Fig. S16C) were performed 14 days post-transfection.

**Dual-luciferase reporter assay:** The 3'UTR of SIN3A was cloned into the XhoI/NotI restriction enzyme sites in the 3'UTR of *Renilla* luciferase in the psiCHECK<sup>TM</sup>-2 vector (Promega). HEK293T cells were cotransfected with 20ng of psiCHECK-2 vector and different concentrations of miR-138 mimic. The Lipofectamine<sup>TM</sup> RNAiMAX (Invitrogen) reverse transfection protocol was used as described above. The miR-138 binding sites on the SIN3A 3'UTR were mutated using the site-directed, ligase-independent mutagenesis (SLIM) protocol (12, 13). A plasmid with the scrambled miR-138 binding seed sequence was also cotransfected into HEK293T cells with different concentrations of miR-138 mimic using the Lipofectamine<sup>TM</sup> RNAiMAX reverse transfection protocol. The Luciferase Assay Reagent (Promega) was used to measure knockdown of *Renilla* luciferase with the SIN3A 3'UTR (wild type or scrambled) downstream in response to the miR-138 mimic. *Renilla* luciferase expression was normalized to firefly luciferase.

SIN3A 3'UTR:

5'-<sup>1</sup>CUGCAAAG.....<sup>294</sup>**CACCAGCA**.....<sup>726</sup>**CACCAGC**.....<sup>2593</sup>AGGGCUAA-3'

The miR-138 seed sequence binding site on the SIN3A 3'UTR is shown (bold). The nucleotides in bold were mutated to test for sequence specificity of miR-138 mediated repression. The seed sequences were mutated to 5-CUAAUCGC-3'.

**Primer sequences to amplify SIN3A 3'UTR:**

F- AAGTTTAAACCTGCAAAGCCAGAGC

R- TTGCGGCCGCTTAAGTAAGAACCAAGC

**SLIM primers for mutating miR-138 binding sites in the SIN3A 3'UTR:**

First miR-138 binding site

FS- GAGCTAAGACTGGAGTCTCC

RS – TGTGCAAGCAAACCTGCATGTC

FT-

GTTTGCTTGCACACGTTAATCGAGCTAAGACTGGAGTCTCCTGTGGCCTAACTTTCA

ATG

RT –

CATTGAAAGTTAGGCCACAGGAGACTCCAGTCTTAGCTCGATTAACGTGTGCAAGCA

AAC

Second miR-138 binding site

FS – TTTACTCTCTGACACACACACG

RS – GATGGCACTAAGGTAGAC

FT – GTCTACCTTAGTGCCATCCGTTAATTTACTCTCTGACACACACACG

RT – CGTGTGTGTGTCAGAGAGTAAAATTAACGGATGGCACTAAGGTAGAC

**SDS-PAGE and Immunoblotting:** Cell lines or primary cultures were washed with PBS and lysed in freshly prepared lysis buffer (1% Triton, 25mM Tris pH 7.4, 150mM NaCl, protease inhibitors (cOmplete™, mini, EDTA-free, Roche)) for 30 min at 4°C. The lysates were centrifuged at 14,000 rpm for 20 min at 4°C, and the supernatant quantified by BCA Protein Assay kit (Pierce). 20 µg (Calu-3) and 50 µg (human primary airway epithelial cultures, HeLa, HEK293T) of protein per lane was separated on a 7% SDS-PAGE gel for western blot analysis. Antibodies were procured for SIN3A (1:1000, Thermo Scientific), CTCF (1:500, Cell Signaling Technology), CFTR (R-769 (1:2000, CFFT), MM13-4 (1:1000, Millipore), M3A7 (1:500, Millipore), 24-1 (1:1000, R&D Systems)), hemagglutinin (1:1000, Covance) and  $\alpha$ -tubulin (1:10000, Sigma). Protein abundance was quantified by densitometry using an AlphaInnotech Fluorochem Imager (AlphaInnotech). For CFTR, band B and C were quantified separately. All bands were normalized to  $\alpha$ -tubulin. Experiments were performed in triplicates per donor and mean and standard error of the mean determined using unpaired two-tailed t-test. SIN3A and CFTR immunoblots in cell lines shown represent 8 independent transfections pooled.

Densitometry measurements in cell lines represents western blots performed in triplicate from 4 separate experiments. SIN3A and CFTR immunoblots in human primary airway epithelial cultures shown represent 8 independent transfections. Densitometry measurements in human primary airway epithelial cultures represent 8 independent transfections in 8 non-CF donors each and 4 CF donors each. Western blots were probed, stripped and re-probed as follows. PVDF membranes were first probed with the R-769 anti-CFTR antibody. After imaging, the PVDF membrane was stripped with Restore Western Blot Stripping Buffer (Thermo Scientific) for 15 minutes, washed in Tris Buffered Saline-Tween (TBS-T) and blocked in 5% Bovine Serum Albumin (BSA, Pierce) for 1 hr. The membrane was washed in TBS-T and incubated with the goat anti-mouse secondary antibody (1:10000, Sigma) for 1 hr and imaged. If signal was detected, the stripping procedure was repeated till no signal was observed. The membrane was washed in TBS-T, blocked for 1 hr in 5% BSA and re-probed with the M3A7+MM13-4 anti-CFTR antibody cocktail or the anti-HA antibody. The following pairs of western blots were probed with R-769, and re-probed with M3A7+MM13-4): SI Fig. S6B-both panels, Fig. S13B-both panels, Fig. S15E-both panels.

**Measuring cell surface display of CFTR:** HeLa cells stably expressing wild-type CFTR or CFTR- $\Delta$ F508 were kindly provided by Dr. G. Lukacs (14, 15). Cell surface ELISA was performed on these cells (16) 6 hrs, 12 hrs, and 24 hrs after transfecting with oligonucleotides. HeLa cells were transfected in 96 well plates (Costar) with the SIN3A DsiRNA and miR-138 mimic as described earlier using the Lipofectamine™ RNAiMAX (Invitrogen) recommended reverse transfection protocol. Briefly, the plate containing the cells was moved to a cold room (4°C), and all media used was ice cold. Cells were washed with PBS, and blocked for 30 min with PBS containing 5% BSA. Anti-HA primary antibody (Covance) was added in 5% BSA-PBS at a 1:1000 concentration for 1 hr. Cells were washed with PBS, and anti-mouse secondary antibody HRP conjugated (Amersham) was added to cells at 1:1000 concentration in 5% BSA-PBS for 1 hr. Cells were washed through, and signal developed using SureBlue Reserve™ TMB Microwell Substrate (KPL). The reaction was stopped and read on a VersaMax™ Microplate Reader (Molecular Devices) at 540 nm using the SoftMax® Prof Software (Molecular Devices). For normalization, cells were lysed and total protein quantitated using the BCA Protein Assay kit (Pierce). The experiment was performed in quadruplicate, and the data presented as a mean  $\pm$

standard deviation of individual data points. Statistical significance between groups was determined using Student's t-test.

**Transduction of human primary airway epithelial cultures:** Primary airway epithelial cell cultures were transduced with an adenovirus expressing either wild-type CFTR or CFTR- $\Delta$ F508 (17, 18) at a MOI of 100. The primary culture insert was inverted, the virus was suspended in 50  $\mu$ l of DMEM, and added to the basolateral surface of the culture for a period of 4 hrs. The similar step was then repeated for the apical surface. Throughout, the cultures were kept at 37°C in a 5% CO<sub>2</sub> incubator. For primary airway epithelial cultures from the CF donor (*CFTR* Q493X/S912X) transfected with oligonucleotides, transduction with the Ad-CFTR- $\Delta$ F508 was performed 11 days post-seeding. CFTR immunoblot, RT-qPCR and transepithelial current ( $I_t$ ) measurements were made 14 days post-seeding.

**Microarrays:** Calu-3 cells were transfected with SIN3A DsiRNA and miR-138 mimic by reverse transfection as described above. Total RNA was isolated 48 hrs after transfection using the *mirVana*<sup>TM</sup> miRNA isolation kit (Ambion), and only samples that had a RIN >7.0 were selected for microarray analysis. Microarrays were performed at the University of Iowa DNA Core (2). Briefly, RNA samples were processed with the NuGEN WT-Ovation<sup>TM</sup> Pico RNA Amplification System, v1.0 along with the WT-Ovation<sup>TM</sup> Exon Module, v1.0 (NuGEN Technologies) according to the manufacturer's recommended protocols. The GeneChip<sup>®</sup> Human Exon 1.0 ST Array (Affymetrix) was used to probe the samples. Arrays were scanned using the Affymetrix Model 3000 (7G) scanner and the data collected using the GeneChip<sup>®</sup> Operating Software (GCOS), v.1.4. Data analysis was performed on Partek<sup>®</sup> Genomics Suite<sup>TM</sup> (Partek) using the one-way ANOVA and Student's t-test to determine differentially expressed genes.

**Iodide Efflux assay:** Iodide efflux measurements in HeLa cells were made using a protocol adapted by Lukacs and colleagues (14, 19). Briefly, HeLa cells were transfected with oligonucleotides in 24 well plates (Costar), and the assay was performed 48 hrs post-transfection (8 wells per condition). As controls, HeLa cells stably expressing wild-type CFTR were plated in 24 well plates (4 wells for cAMP induction and 4 wells for DMSO mock). Cells were observed prior to the experiment to ensure ~90% confluence. Wells were washed thrice with 2 ml loading buffer, and incubated in 2 ml loading buffer for 1hr. Wells were washed 7 times in 5 min with 200  $\mu$ l efflux buffer. 200  $\mu$ l of efflux buffer was added to each well with a repeat pipettor, and aspirated after 30 sec and stored. After 8 minutes, wells designated for the DMSO control received efflux buffer containing DMSO. Wells designated as test received efflux buffer containing 10  $\mu$ M forskolin and 100  $\mu$ M IBMX. 12 such washes were performed in as many minutes. Iodide concentrations in the samples stored were read using iodide selective electrodes that were calibrated with a standard curve.

**Chromatin Immunoprecipitation (ChIP):** ChIP was carried out using the EZ-ChIP kit from Millipore (Upstate Protocol). Human primary airway epithelial cells were grown on 150 mm dishes and 5 x 10<sup>7</sup> cells were used. Cells were crosslinked with 1% formaldehyde for 10 min and reaction stopped with 0.125 M glycine. Cells were washed with PBS and lysed in 1 ml of 1% SDS, 10 mM EDTA, 50 mM Tris/HCl (pH 8.1) with protease inhibitors. Sample was sonicated to generate fragments under 500 bp. Immunoprecipitation was performed overnight at 4°C with the SIN3A antibody (Santa Cruz Biotechnology). Manufacturer's recommended protocol were followed with modifications (20-23) and immunoprecipitation from each donor was performed in triplicate. Primer sequences used for amplifying DNase I hypersensitive sites (DHS) regions 17a DHS (normalizer), -20.9 DHS, +6.8 DHS and +15.6 DHS (negative control) were obtained

from the literature (20, 21). Intron 17a DHS has been reported to not have a putative CTCF binding site or bind CTCF (20, 21). -20.9 DHS, +6.8 DHS and +15.6 DHS have been shown to have a putative CTCF binding site, but CTCF has been demonstrated to bind only the -20.9 DHS and +6.8 DHS (20, 21). Additional controls used were: co-immunoprecipitation of CTCF with an anti-SIN3A antibody (24), ChIP with anti-SIN3A antibody without formaldehyde crosslinking, and ChIP without the use of anti-SIN3A antibody. As a positive control, ChIP with anti-CTCF antibody was performed and enrichment was confirmed at -20.9 kb relative to 17a.

#### **DHS17A**

Forward- GGATAGTGCTGCTATTACTAAAGGTTTCT

Reverse- ATGGCAGCTCCAACACATGA

Probe- /56-FAM/TCTGAAGACAACAAGCCAAAGGGACAAATTT/3IABkFQ/

#### **DHS -20.9**

Forward- CCGGGATGTTGTTTGAAGCTT

Reverse- TTAAATAGTTGAATAGAGGACGAGATACTTT

Probe- /56-FAM/ATAGTATTTTCTTCTCTCTTCCCTTACCTGCCCTCTGCT/3IABkFQ/

#### **DHS +15.6**

Forward- ATCCATTTTCTTCAAGTCTCTCTCCAT

Reverse- GGAATGAGGATTGTTTATGATTTG

Probe- /56-FAM/CCTCTTTATGGAATCTCCTTTTGATTTGAACTTTGA/3IABkFQ/

#### **DHS +6.8**

Forward- TCTTCTTTCCCATTCACCTTTGTC

Reverse- TTTTGGTTTCATTTATACGCACATC

Probe- /56-FAM/CCATTGCTGATAAAGATTGCTCCTTCTATTATTCCA/3IABkFQ/

**CFTR-Associated Gene Network:** Gene products shown previously to interact with CFTR were curated from published literature (16, 25-27) and were collated to generate a list of CFTR-associated genes. The complete gene list is presented in SI Table S2. This list was cross referenced with the differentially expressed genes from the miR-138 mimic or SIN3A DsiRNA intervention in Calu-3 cells and used to assess the enrichment significance for genes influencing CFTR biogenesis. The complete enrichment profile is available in SI Table S3.

**LDH cytotoxicity assay:** Calu-3 cells and CFBE cells were transfected with the following reagents- miR-138 mimic, miR-138 anti-miR, SIN3A DsiRNA, CFTR DsiRNA, and Scr. Cells were seeded onto pre-coated filters. The apical surface was washed, and the basolateral media collected on days 4, 8, 12 and 16 post-transfection. LDH cytotoxicity assay kit (Cayman chemical) was used to measure the levels of lactate dehydrogenase in the washes and basolateral media. Percentage toxicity and viability were computed based on LDH levels. Data were normalized to untransfected cells and are presented in SI Fig. S14.

**Epistatic relationship between SIN3A and miR-138:** HEK293T and Calu-3 cells were transfected with the following reagents: miR-138 mimic/anti-miR, Scr (mimic/anti-miR/DsiRNA), SIN3A DsiRNA, human SIN3A cDNA expression plasmid (CMV driven cassette, OriGene, RC227622), or empty expression plasmid, using lipofectamine RNAiMAX by reverse transfection (Fig. S17). The plasmid transfection efficiency for Calu-3 cells was 20-40% based on a GFP reporter control.

**Statistical Analysis:** Data are presented as a mean  $\pm$  standard error of individual data points. Statistical significance between groups was determined using Student's t-test or one-way ANOVA as indicated. A *P*-value  $<0.05$  was considered significant.



## REFERENCES

1. Karp PH, *et al.* (2002) An in vitro model of differentiated human airway epithelia. Methods for establishing primary cultures. *Methods Mol Biol* 188:115-137.
2. Ramachandran S, Clarke LA, Scheetz TE, Amaral MD, & McCray PB, Jr. (2011) Microarray mRNA expression profiling to study cystic fibrosis. *Methods Mol Biol* 742:193-212.
3. Kunzelmann K, *et al.* (1993) An immortalized cystic fibrosis tracheal epithelial cell line homozygous for the delta F508 CFTR mutation. *Am J Respir Cell Mol Biol* 8:522-529.
4. Kim DH, *et al.* (2005) Synthetic dsRNA Dicer substrates enhance RNAi potency and efficacy. *Nat Biotechnol* 23(2):222-226.
5. Rose SD, *et al.* (2005) Functional polarity is introduced by Dicer processing of short substrate RNAs. *Nucleic Acids Res* 33(13):4140-4156.
6. Behlke MA (2008) Chemical modification of siRNAs for in vivo use. *Oligonucleotides* 18(4):305-319.
7. Collingwood MA, *et al.* (2008) Chemical modification patterns compatible with high potency dicer-substrate small interfering RNAs. *Oligonucleotides* 18(2):187-200.
8. Henry JC, Azevedo-Pouly AC, & Schmittgen TD (2011) microRNA Replacement Therapy for Cancer. *Pharm Res* 28(12):3030-3042.
9. Lennox KA & Behlke MA (2011) Chemical modification and design of anti-miRNA oligonucleotides. *Gene Ther* 18(12):1111-1120.
10. Melkman-Zehavi T, *et al.* (2011) miRNAs control insulin content in pancreatic beta-cells via downregulation of transcriptional repressors. *The EMBO journal* 30(5):835-845.
11. Itani OA, *et al.* (2011) Human cystic fibrosis airway epithelia have reduced Cl<sup>-</sup> conductance but not increased Na<sup>+</sup> conductance. *Proc Natl Acad Sci U S A* 108(25):10260-10265.
12. Chiu J, Tillett D, Dawes IW, & March PE (2008) Site-directed, Ligase-Independent Mutagenesis (SLIM) for highly efficient mutagenesis of plasmids greater than 8kb. *J Microbiol Methods* 73(2):195-198.
13. Chiu J, March PE, Lee R, & Tillett D (2004) Site-directed, Ligase-Independent Mutagenesis (SLIM): a single-tube methodology approaching 100% efficiency in 4 h. *Nucleic Acids Res* 32(21):e174.
14. Sharma M, Benharouga M, Hu W, & Lukacs GL (2001) Conformational and temperature-sensitive stability defects of the delta F508 cystic fibrosis transmembrane conductance regulator in post-endoplasmic reticulum compartments. *J Biol Chem* 276(12):8942-8950.
15. Sharma M, *et al.* (2004) Misfolding diverts CFTR from recycling to degradation: quality control at early endosomes. *J Cell Biol* 164(6):923-933.
16. Okiyoneda T, *et al.* (2010) Peripheral protein quality control removes unfolded CFTR from the plasma membrane. *Science* 329(5993):805-810.
17. Zabner J, Zeiher BG, Friedman E, & Welsh MJ (1996) Adenovirus-mediated gene transfer to ciliated airway epithelia requires prolonged incubation time. *J Virol* 70(10):6994-7003.
18. Sinn PL, Shah AJ, Donovan MD, & McCray PB, Jr. (2005) Viscoelastic gel formulations enhance airway epithelial gene transfer with viral vectors. *Am J Respir Cell Mol Biol* 32(5):404-410.
19. Glzman R, *et al.* (2009) N-glycans are direct determinants of CFTR folding and stability in secretory and endocytic membrane traffic. *J Cell Biol* 184(6):847-862.

20. Blackledge NP, *et al.* (2007) CTCF mediates insulator function at the CFTR locus. *Biochem J* 408(2):267-275.
21. Blackledge NP, Ott CJ, Gillen AE, & Harris A (2009) An insulator element 3' to the CFTR gene binds CTCF and reveals an active chromatin hub in primary cells. *Nucleic Acids Res* 37(4):1086-1094.
22. Das PM, Ramachandran K, vanWert J, & Singal R (2004) Chromatin immunoprecipitation assay. *Biotechniques* 37(6):961-969.
23. Fowler AM, Solodin NM, Valley CC, & Alarid ET (2006) Altered target gene regulation controlled by estrogen receptor-alpha concentration. *Mol Endocrinol* 20(2):291-301.
24. Lutz M, *et al.* (2000) Transcriptional repression by the insulator protein CTCF involves histone deacetylases. *Nucleic Acids Res* 28(8):1707-1713.
25. Hutt DM, *et al.* (2010) Reduced histone deacetylase 7 activity restores function to misfolded CFTR in cystic fibrosis. *Nat Chem Biol* 6(1):25-33.
26. Liekens AM, *et al.* (2011) BioGraph: unsupervised biomedical knowledge discovery via automated hypothesis generation. *Genome Biol* 12(6):R57.
27. Wang X, *et al.* (2006) Hsp90 cochaperone Aha1 downregulation rescues misfolding of CFTR in cystic fibrosis. *Cell* 127(4):803-815.
28. Gomes-Alves P, Neves S, Coelho AV, & Penque D (2009) Low temperature restoring effect on F508del-CFTR misprocessing: A proteomic approach. *J Proteomics* 73(2):218-230.
29. Rebhan M, Chalifa-Caspi V, Prilusky J, & Lancet D (1998) GeneCards: a novel functional genomics compendium with automated data mining and query reformulation support. *Bioinformatics* 14(8):656-664.
30. Rebhan M, Chalifa-Caspi V, Prilusky J, & Lancet D (1997) GeneCards: integrating information about genes, proteins and diseases. *Trends Genet* 13(4):163.
31. Safran M, *et al.* (2010) GeneCards Version 3: the human gene integrator. *Database (Oxford)* 2010:baq020.
32. Morito D, *et al.* (2008) Gp78 cooperates with RMA1 in endoplasmic reticulum-associated degradation of CFTRDeltaF508. *Mol Biol Cell* 19(4):1328-1336.
33. Gomes-Alves P, Couto F, Pesquita C, Coelho AV, & Penque D (2010) Rescue of F508del-CFTR by RXR motif inactivation triggers proteome modulation associated with the unfolded protein response. *Biochim Biophys Acta* 1804(4):856-865.
34. Riordan JR (2008) CFTR function and prospects for therapy. *Annu Rev Biochem* 77:701-726.
35. Okiyoneda T, *et al.* (2002) Calnexin Delta 185-520 partially reverses the misprocessing of the Delta F508 cystic fibrosis transmembrane conductance regulator. *FEBS letters* 526(1-3):87-92.
36. Okiyoneda T, *et al.* (2004) Delta F508 CFTR pool in the endoplasmic reticulum is increased by calnexin overexpression. *Mol Biol Cell* 15(2):563-574.
37. Amaral MD (2005) Processing of CFTR: traversing the cellular maze--how much CFTR needs to go through to avoid cystic fibrosis? *Pediatr Pulmonol* 39(6):479-491.
38. Aversa M, *et al.* (2011) Calpain digestion and HSP90-based chaperone protection modulate the level of plasma membrane F508del-CFTR. *Biochim Biophys Acta* 1813(1):50-59.
39. Xu Y, Liu C, Clark JC, & Whitsett JA (2006) Functional genomic responses to cystic fibrosis transmembrane conductance regulator (CFTR) and CFTR(delta508) in the lung. *J Biol Chem* 281(16):11279-11291.
40. Rennolds J, *et al.* (2008) Cystic fibrosis transmembrane conductance regulator trafficking is mediated by the COPI coat in epithelial cells. *J Biol Chem* 283(2):833-839.

41. Fu L, *et al.* (2011) Dab2 is a Key Regulator of Endocytosis and Post-endocytic Trafficking of the Cystic Fibrosis Transmembrane Conductance Regulator. *Biochem J* 441(2):633-643.
42. Sun F, *et al.* (2006) Derlin-1 promotes the efficient degradation of the cystic fibrosis transmembrane conductance regulator (CFTR) and CFTR folding mutants. *J Biol Chem* 281(48):36856-36863.
43. Loo MA, *et al.* (1998) Perturbation of Hsp90 interaction with nascent CFTR prevents its maturation and accelerates its degradation by the proteasome. *The EMBO journal* 17(23):6879-6887.
44. McLellan CA, Raynes DA, & Guerriero V (2003) HspBP1, an Hsp70 cochaperone, has two structural domains and is capable of altering the conformation of the Hsp70 ATPase domain. *J Biol Chem* 278(21):19017-19022.
45. Caohuy H, Jozwik C, & Pollard HB (2009) Rescue of DeltaF508-CFTR by the SGK1/Nedd4-2 signaling pathway. *J Biol Chem* 284(37):25241-25253.
46. Yoo JS, *et al.* (2002) Non-conventional trafficking of the cystic fibrosis transmembrane conductance regulator through the early secretory pathway. *J Biol Chem* 277(13):11401-11409.
47. Wang X, *et al.* (2004) COPII-dependent export of cystic fibrosis transmembrane conductance regulator from the ER uses a di-acidic exit code. *J Cell Biol* 167(1):65-74.
48. Wang X, Koulov AV, Kellner WA, Riordan JR, & Balch WE (2008) Chemical and biological folding contribute to temperature-sensitive DeltaF508 CFTR trafficking. *Traffic* 9(11):1878-1893.
49. Yamaguchi A, *et al.* (1999) Stress-associated endoplasmic reticulum protein 1 (SERP1)/Ribosome-associated membrane protein 4 (RAMP4) stabilizes membrane proteins during stress and facilitates subsequent glycosylation. *J Cell Biol* 147(6):1195-1204.
50. Younger JM, *et al.* (2004) A foldable CFTR{Delta}F508 biogenic intermediate accumulates upon inhibition of the Hsc70-CHIP E3 ubiquitin ligase. *J Cell Biol* 167(6):1075-1085.
51. Huang da W, Sherman BT, & Lempicki RA (2009) Bioinformatics enrichment tools: paths toward the comprehensive functional analysis of large gene lists. *Nucleic Acids Res* 37(1):1-13.

**Fig. S1.**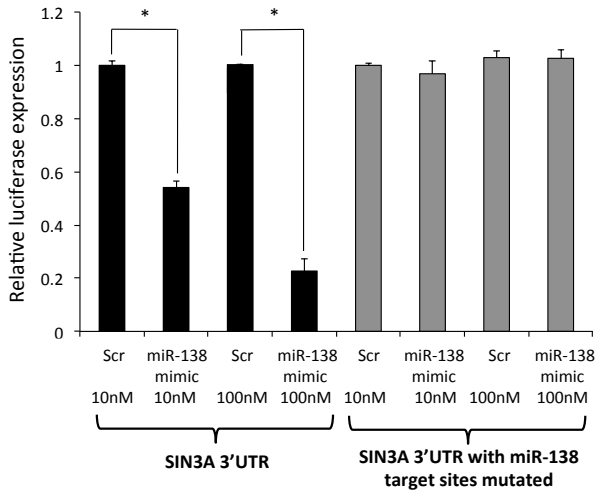**Fig. S2.**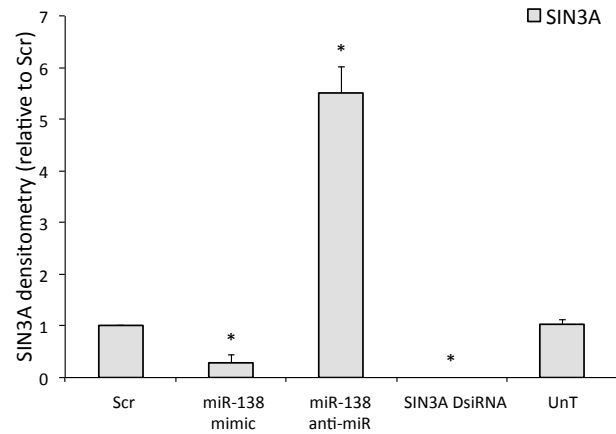**Fig. S3A.**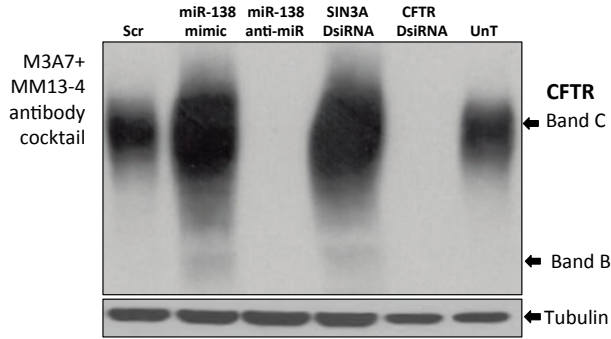**Fig. S3B.**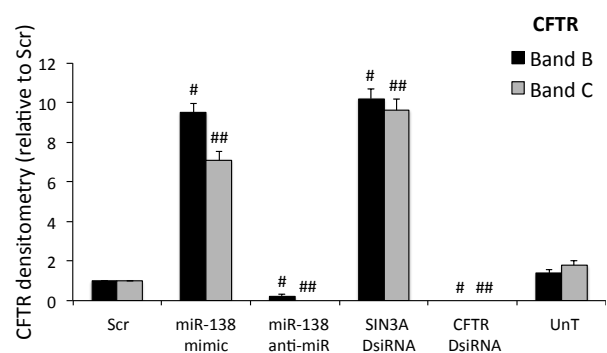

**Fig. S1.** miR-138 regulates SIN3A in a dose-dependent and site-specific manner. HEK293T cells were co-transfected with the psiCHECK-2 vector (containing the SIN3A 3'UTR) and increasing concentrations of Scr or miR-138 mimic (Scr: non-targeting control oligonucleotide). To test site-specificity, the two predicted binding sites of miR-138 on SIN3A 3'UTR cloned in the psiCHECK-2 vector were mutated and the experiment repeated. Error bars indicate mean  $\pm$  SE; (n=4, 3 replicates each); \* $P$  < 0.01, relative to Scr.

**Fig. S2.** miR-138 regulates endogenous SIN3A protein expression. Densitometry and relative fold change of SIN3A protein abundance in 6 human donors of primary airway epithelial cultures (8 replicates each). Immunoblots were performed 72 hrs post-transfection. SIN3A DsiRNA (positive control), UnT (Un-transfected cells). Error bars indicate mean  $\pm$  SE, \* $P$  < 0.01, relative to Scr.

**Fig. S3.** miR-138 regulates endogenous CFTR protein expression in Calu-3 cells. (A) Representative CFTR immunoblot in Calu-3 cells 72 hrs post-transfection (M3A7+MM13-4 antibody cocktail). (B) Densitometry and relative fold change of CFTR protein abundance (R769 antibody) from (n=4, 3 replicates each). Error bars indicate mean  $\pm$  SE, # $P$  < 0.01, relative to Scr CFTR band B; ## $P$  < 0.01, relative to Scr CFTR band C.

**Fig. S4A.**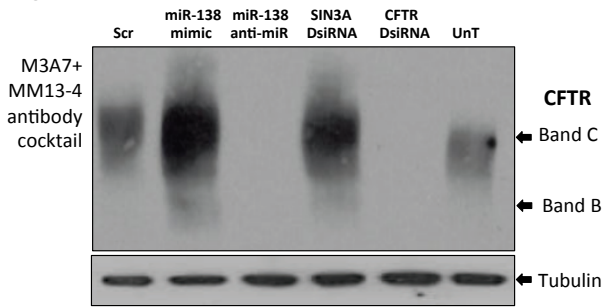**Fig. S4B.**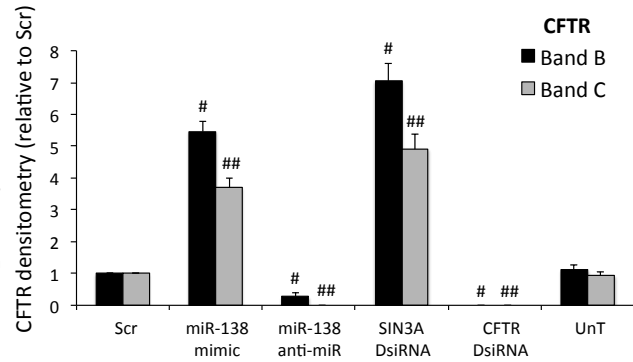**Fig. S5A.**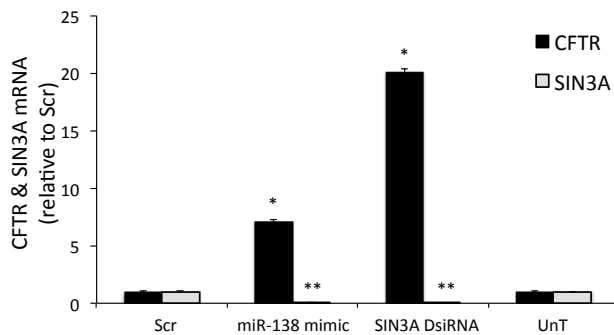**Fig. S5B.**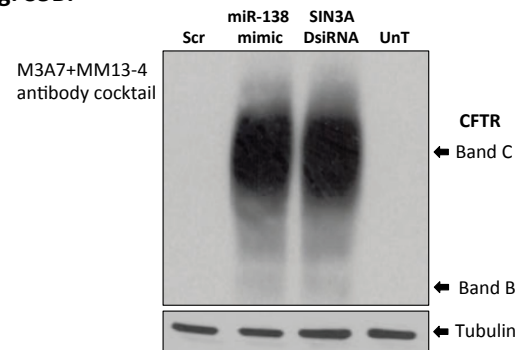

**Fig. S4.** miR-138 regulates endogenous CFTR protein expression in primary human airway epithelia. (A) CFTR immunoblot from one human donor of primary airway epithelial 72 hrs post-transfection (M3A7+MM13-4 antibody cocktail). (B) Densitometry and relative fold change of CFTR protein abundance (R769 antibody) in primary airway epithelia from 6 different human donors (8 replicates each). Error bars indicate mean  $\pm$  SE, # $P$  < 0.01, relative to Scr CFTR Band B; ## $P$  < 0.01, relative to Scr CFTR Band C.

**Fig. S5.** miR-138 regulates CFTR expression in HeLa cells. (A) Relative *CFTR* and *SIN3A* mRNA abundance in HeLa cells 24 hrs post-transfection (n=4, 8 replicates each). (B) Representative CFTR immunoblot (n=4, 3 replicates each) performed 72 hrs post-transfection (M3A7+MM13-4 antibody cocktail). Densitometry not shown as no CFTR protein detected in HeLa cells. Error bars indicate mean  $\pm$  SE, \* $P$  < 0.01, relative to Scr (for CFTR); \*\* $P$  < 0.01, relative to Scr (for SIN3A).

**Fig. S6A.**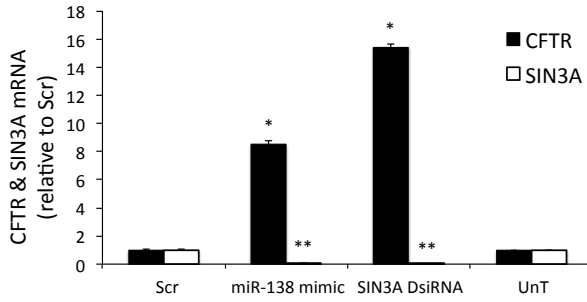**Fig. S6B.**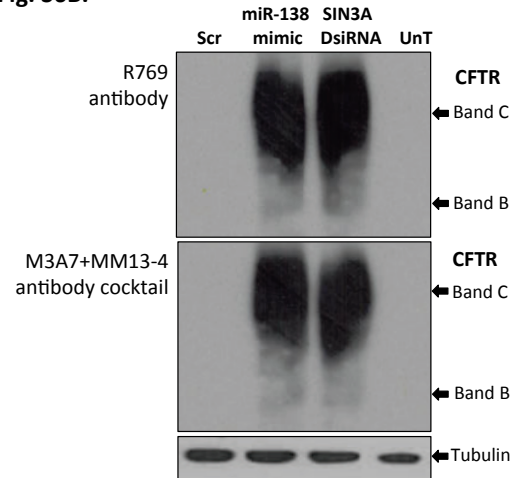**Fig. S7A.**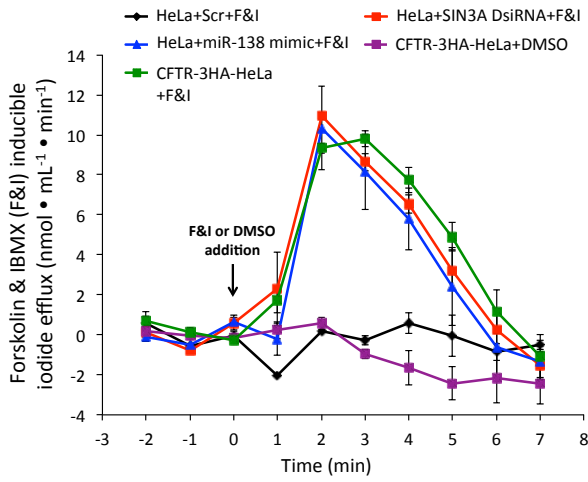**Fig. S7B.**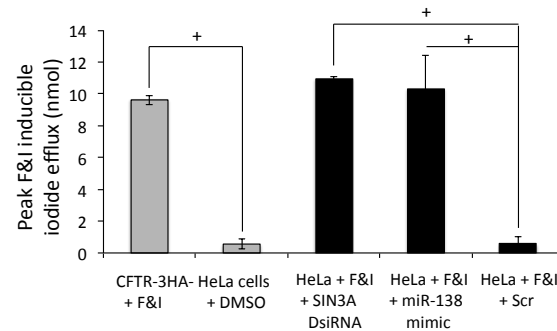

**Fig. S6.** miR-138 regulates CFTR expression in HEK293T cells. (A) Relative *CFTR* and *SIN3A* mRNA abundance in HEK293T cells 24 hrs post-transfection (n=4, 8 replicates each). (B) Representative CFTR immunoblots (done in triplicate from 4 separate experiments) performed 72 hrs post-transfection. PVDF membrane was first probed with R769 antibody (top panel), stripped and re-probed with the M3A7+MM13-4 antibody cocktail (bottom panel). Densitometry not shown as no CFTR protein detected in HEK293T cells. Error bars indicate mean  $\pm$  SE, \* $P$  <0.01, relative to Scr (CFTR); \*\* $P$  <0.01, relative to Scr (SIN3A).

**Fig. S7.** HeLa cells exhibit CFTR channel activity. (A and B) Iodide efflux assay performed in HeLa cells 48 hrs post-transfection with the miR-138 mimic and SIN3A DsiRNA (8 independent transfections per condition). HeLa cells stably expressing the wild-type CFTR (CFTR-3HA-HeLa) were used as controls. Each data point represents 8 transfections. + $P$  <0.01. F&I denotes addition of forskolin and IBMX as described in Methods.

**Fig. S8A.**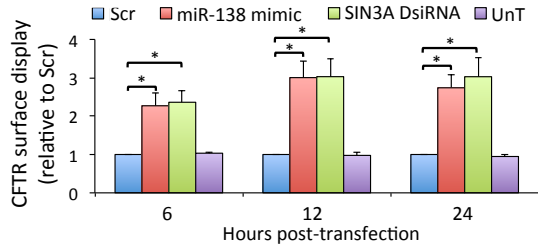**Fig. S8B.**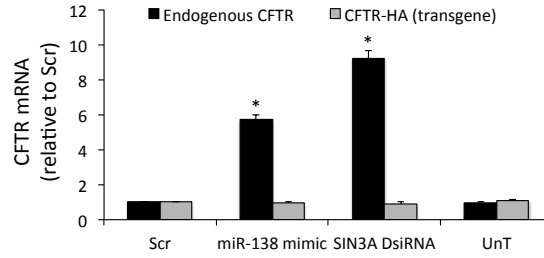**Fig. S8C.**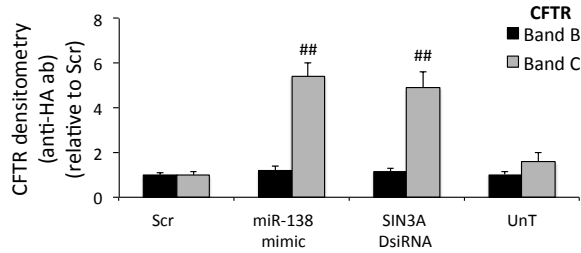**Fig. S8D.**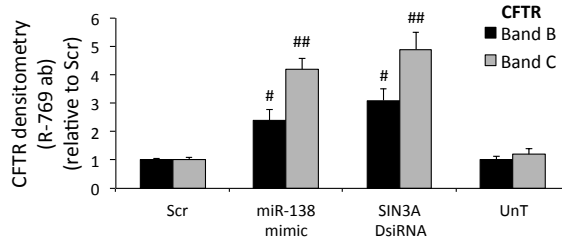

**Fig. S8.** miR-138 improves CFTR processing. (A) Cell surface ELISA to detect CFTR with an anti-HA antibody in HeLa-CFTR cells 6, 12, and 24 hrs post-transfection with noted reagents (n=3, 6 replicates each). (B) Relative *CFTR* mRNA abundance in HeLa-CFTR cells 24 hrs post-transfection. Primers were designed to distinguish between endogenous *CFTR* mRNA and the CFTR-HA transgene (n=3, 6 replicates each). (C and D) Densitometry and relative fold change of CFTR protein abundance (n=4, 8 replicates each) in HeLa cells stably expressing the wild type CFTR-3HA. (C) Anti-HA antibody (Covance). (D) Anti-CFTR antibody (R769 antibody). Based on results in HeLa cells (Fig. 2E, SI Fig. S5) and the increase in endogenous *CFTR* mRNA (SI Fig. S8B) in response to miR-138 mimic or SIN3A DsiRNA, the increased abundance of CFTR band C represents the sum of both CFTR-3HA biogenesis and endogenous CFTR protein expression. Error bars indicate mean  $\pm$  SE; \* $P$  < 0.01 relative to Scr; # $P$  < 0.01, relative to Scr CFTR band B; ## $P$  < 0.01, relative to Scr CFTR band C.

**Fig. S9A.**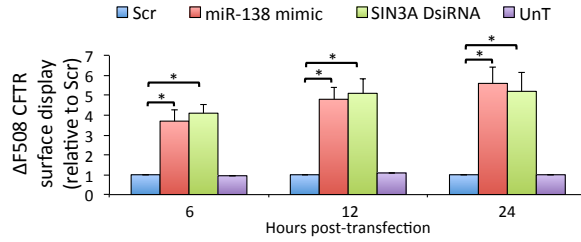**Fig. S9B.**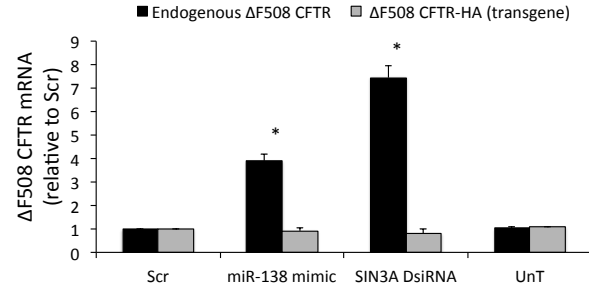**Fig. S9C.**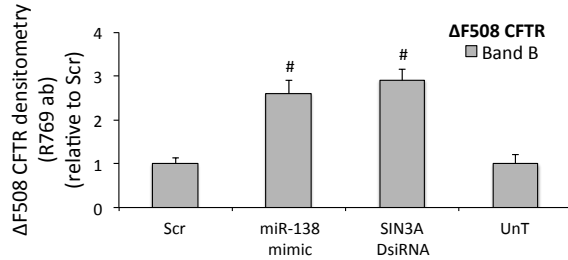**Fig. S9D.**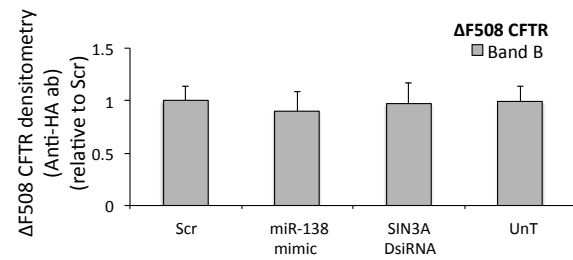

**Fig. S9.** miR-138 improves CFTR-ΔF508 processing. (A) Cell surface ELISA to detect CFTR-ΔF508 with an anti-HA antibody in HeLa-CFTR-ΔF508 cells 6, 12 and 24 hrs post-transfection with noted reagents (n=3, 6 replicates each). (B) Relative *CFTR* mRNA abundance in HeLa-CFTR cells 24 hrs post-transfection. Primers were designed to distinguish between endogenous *CFTR* mRNA and the CFTR-HA transgene (n=3, 6 replicates each). (C and D) Densitometry and relative fold change of CFTR-ΔF508 protein abundance (n=4, 8 replicates each) in HeLa cells stably expressing HA-tagged CFTR-ΔF508. Fold change of band C not shown, as no band C detected in Scr and UnT samples. (C) Anti-HA antibody (Covance). (D) Anti-CFTR antibody (R769 antibody). Based on results in HeLa cells (Fig. 2E, SI Fig. S5) and the increase in endogenous *CFTR* mRNA (SI Fig. S9B) in response to miR-138 mimic or SIN3A DsiRNA, the increased abundance of CFTR band C represents the sum of both the increased abundance of HA-tagged CFTR-ΔF508 processing as well as endogenous CFTR protein expression. Error bars indicate mean ± SE; \* $P < 0.01$  relative to Scr; # $P < 0.01$ , relative to Scr CFTR band B.



**Fig. S10A.**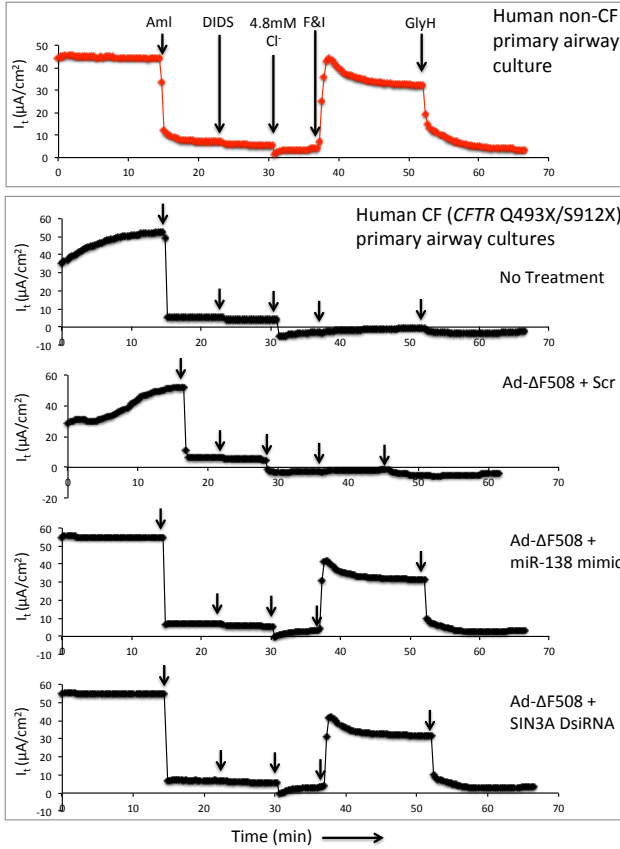**Fig. S10B.**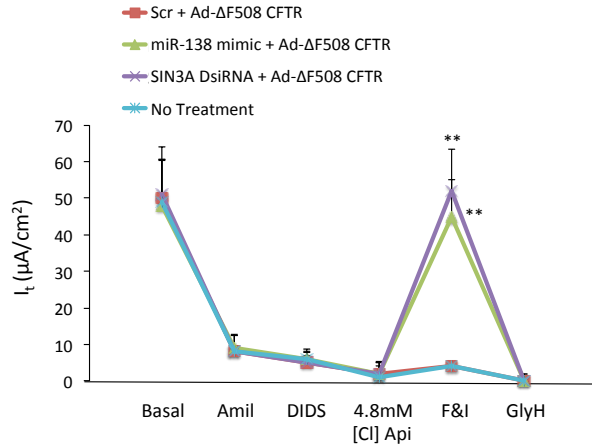**Fig. S11.**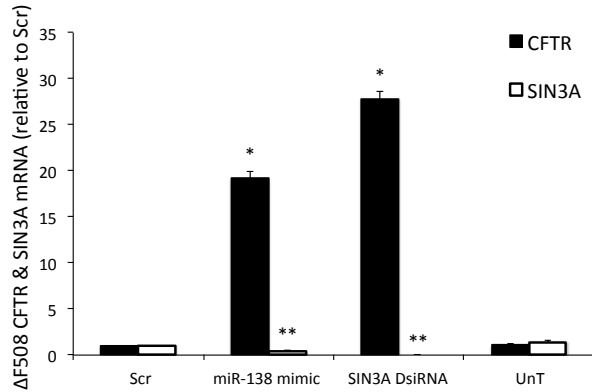

**Fig. S10.** SIN3A inhibition yields partial rescue of  $\text{Cl}^-$  transport in CF epithelia. (A) Representative tracings of transepithelial current ( $I_t$ ) responses after sequential apical application of noted reagents in primary *CFTR* null human airway epithelial (*CFTR* Q493X/S912X). (B) Average transepithelial current ( $I_t$ ) responses after sequential apical application of noted reagents in primary airway epithelia (*CFTR* Q493X/S912X). Aml=Amiloride. Each data point represented by 3 cultures. Basal transepithelial resistance range: 279-360 ohms $\cdot\text{cm}^2$ . Error bars indicate mean  $\pm$  SE, \* $P < 0.01$ , relative to Scr (SIN3A); \*\* $P < 0.01$ , relative to Scr after F&I stimulation.

**Fig. S11.** miR-138 regulates endogenous *CFTR* and *SIN3A* expression in CF primary airway epithelia. Relative *CFTR*- $\Delta\text{F508}$  and *SIN3A* mRNA abundance in 4 human donors of CF ( $\Delta\text{F508}/\Delta\text{F508}$ ) primary airway epithelia 24 hrs post-transfection (8 replicates per donor). Error bars indicate mean  $\pm$  SE, \* $P < 0.01$ , relative to Scr (for *CFTR*); \*\* $P < 0.01$ , relative to Scr (for *SIN3A*).

Fig. S12A.

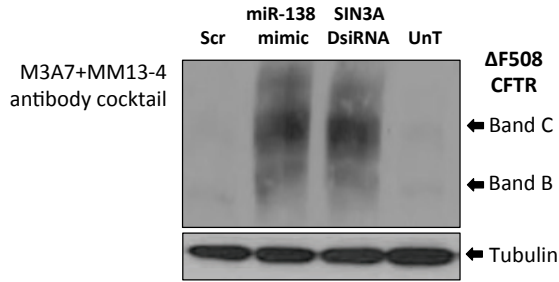

Fig. S12B.

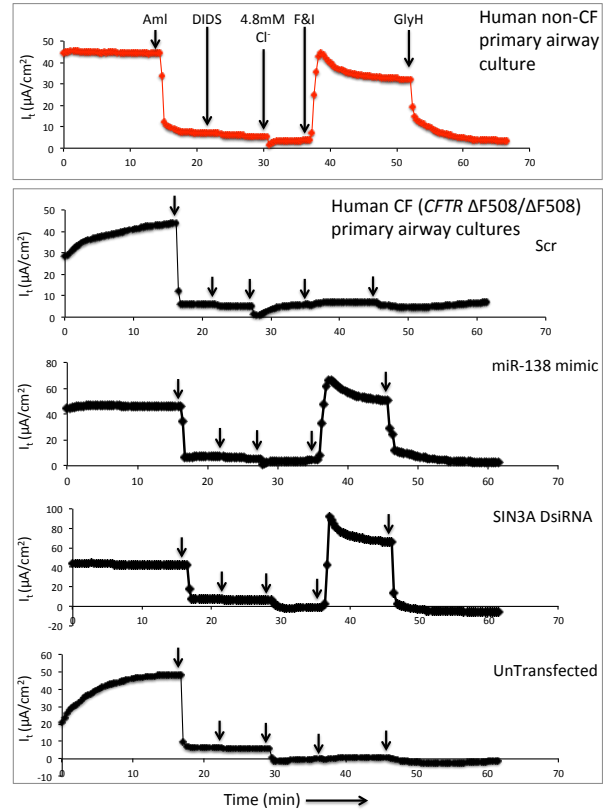

Fig. S12C.

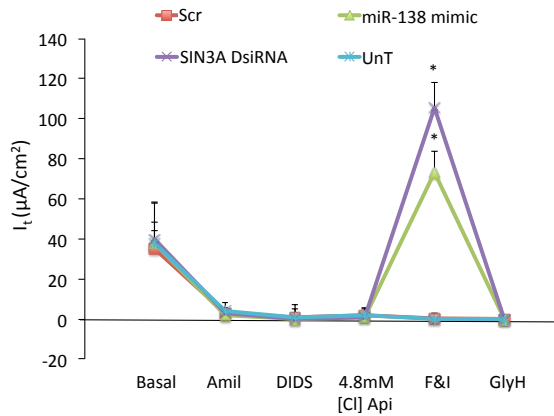

**Fig. S12.** SIN3A inhibition yields partial rescue of Cl<sup>-</sup> transport in CF epithelia. (A) CFTR-ΔF508 immunoblot in a human donor of primary CF (ΔF508/ΔF508) primary airway epithelia 72 hrs post-transfection (8 replicates, Donor #2 on Fig. 4D; M3A7+MM13-4 antibody cocktail). (B) Representative tracings of transepithelial current ( $I_t$ ) response after sequential apical application of noted reagents in primary airway epithelia (*CFTR* ΔF508/ΔF508). (C) Average transepithelial current ( $I_t$ ) responses after sequential apical application of noted reagents. Each data point represented by 8 cultures. Basal transepithelial resistance range: 488-691 ohms\*cm<sup>2</sup>. Error bars indicate mean ± SE, \* $P < 0.01$  relative to Scr after F&I stimulation.

**Fig. S13A.**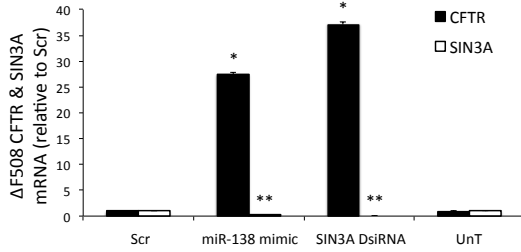**Fig. S13B.**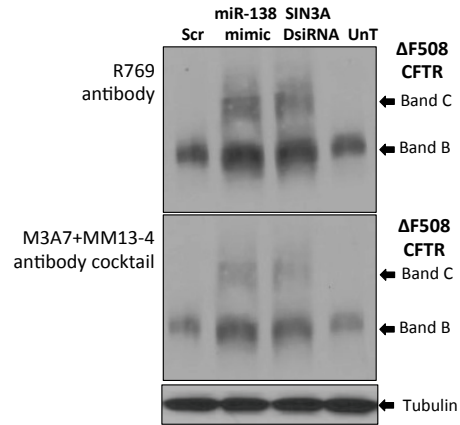**Fig. S13C.**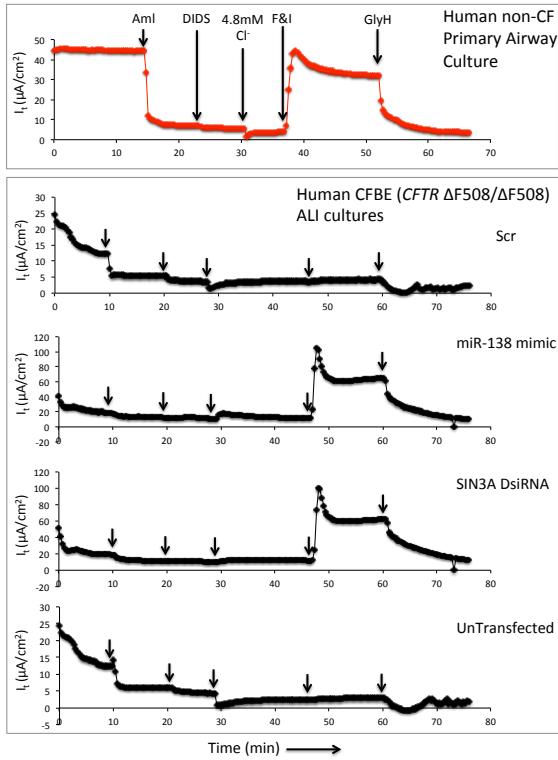**Fig. S13D.**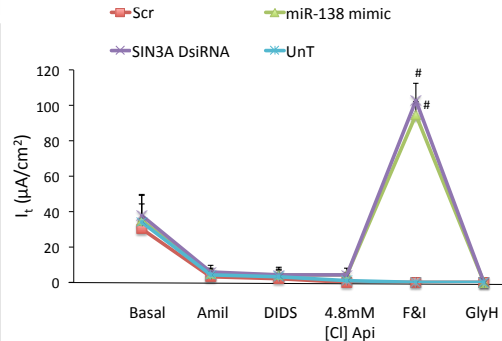**Fig. S13E.**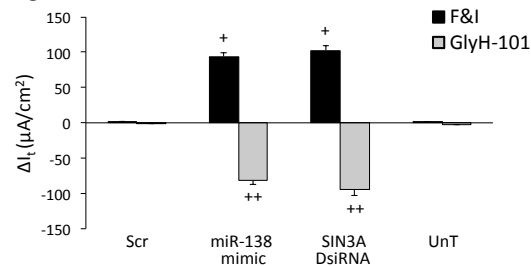

**Fig. S13.** miR-138 regulates endogenous CFTR and SIN3A expression in CFBE cells. (A) Relative *CFTR*- $\Delta$ F508 and *SIN3A* mRNA abundance in CFBE cells (*CFTR*  $\Delta$ F508/ $\Delta$ F508) 24 hrs post-transfection (n=4, 8 replicates). (B) Representative CFTR immunoblot in CFBE cells performed 72 hrs post-transfection (n=4, 8 replicates). PVDF membrane was first probed with R769 antibody (top panel), stripped and re-probed with the M3A7+MM13-4 antibody cocktail (bottom panel). (C) Representative tracings of transepithelial current ( $I_t$ ) response after sequential apical application of noted reagents in CFBE cells (*CFTR*  $\Delta$ F508/ $\Delta$ F508). (D) Average transepithelial current ( $I_t$ ) responses after sequential apical application of noted reagents. Each data point represented by 8 CFBE ALI cultures. Basal transepithelial resistance range: 478-611 ohms $\cdot$ cm<sup>2</sup>. (E) Change in transepithelial current ( $\Delta I_t$ ) after stimulation with Forskolin + IBMX (F&I) and GlyH. Each data point represented by 8 CFBE ALI cultures. All panels, Error bars indicate mean  $\pm$  SE. \* $P$  < 0.01, relative to Scr (CFTR); \*\* $P$  < 0.01, relative to Scr (SIN3A); # $P$  < 0.01 relative to  $I_t$  in Scr transfected samples upon F&I addition; + $P$  < 0.01 and ++ $P$  < 0.01 relative to  $\Delta I_t$  in Scr transfected samples upon F&I or GlyH-101 stimulation respectively.

**Fig. S14A.**

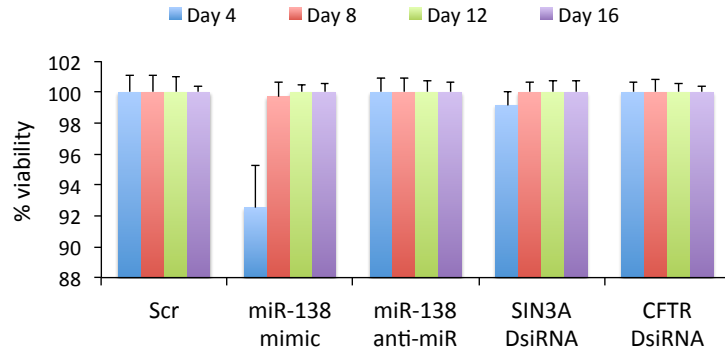

**Fig. S14B.**

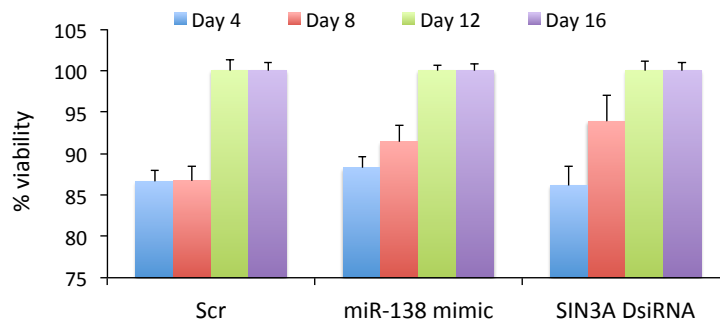

**Fig. S14.** Oligonucleotide transfection does not cause decrease in cell viability. Percentage viability calculated in (A) Calu-3 cells and (B) CFBE cells as a measure of lactate dehydrogenase release 4, 8, 12, and 16 days post-transfection with noted oligonucleotides. Measurements were normalized to untransfected cells. Each bar represents three independent experiments

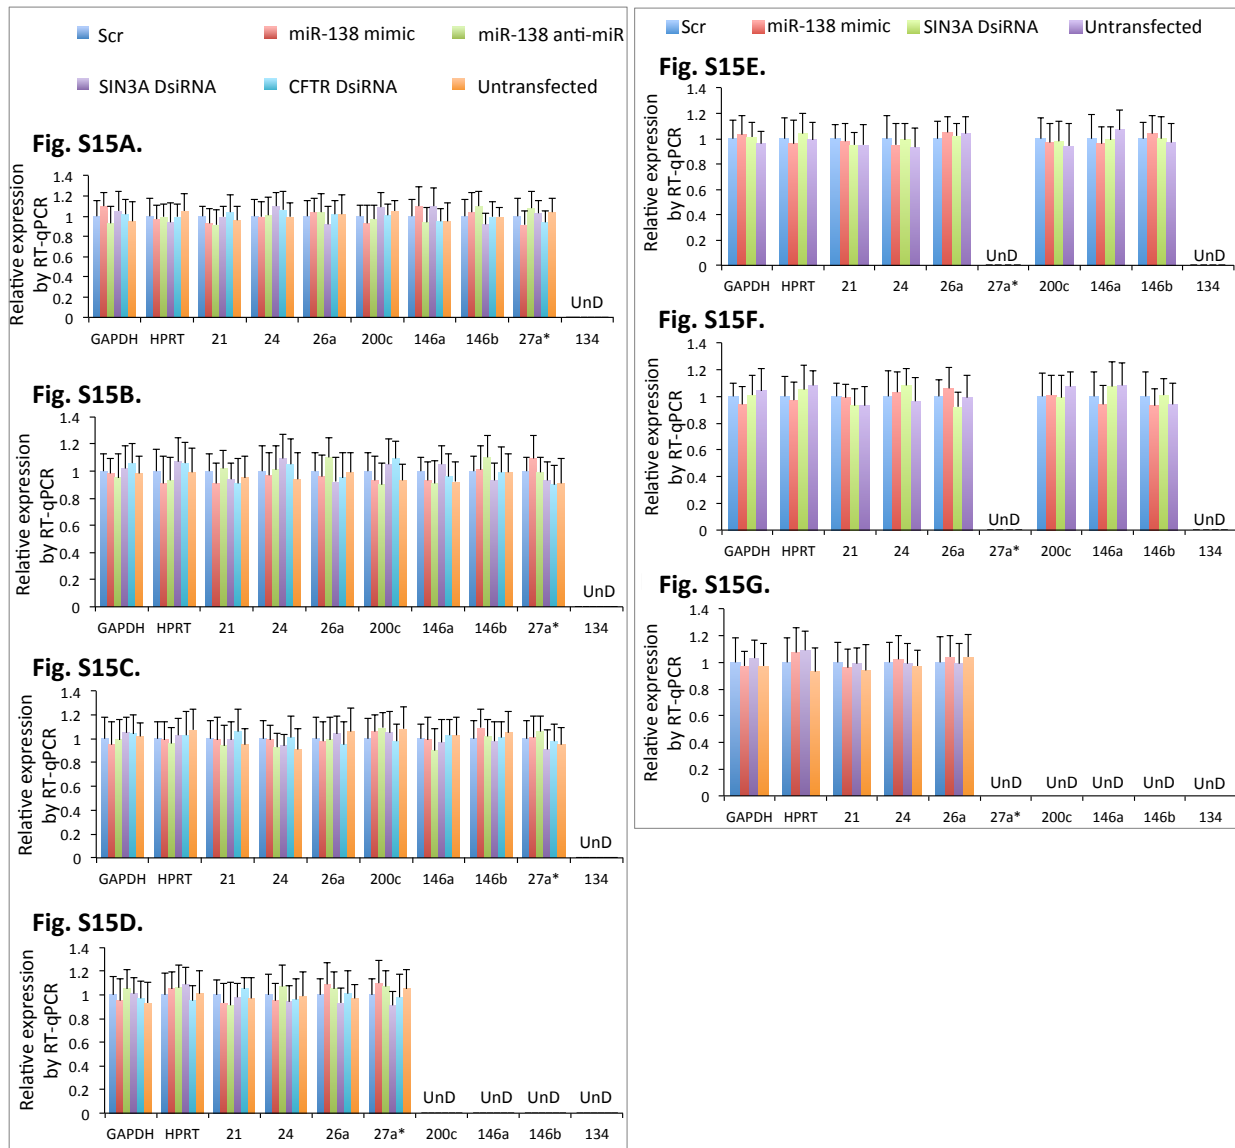

**Fig. S15.** Specificity of oligonucleotide transfections. Relative expression by RT-qPCR of GAPDH and HPRT (normalized to SFRS9), and miRs -21, -24, -26a, -200c, -146a, -146b, -27a\*, -134 (normalized to RNU48). Experiment performed 24 hrs post-transfection in (A) Primary airway epithelia from human non-CF donor #1 (6 replicates), (B) Primary airway epithelia from human non-CF donor #2 (6 replicates), (C) Primary airway epithelia from human non-CF donor #3 (6 replicates), (D) Calu-3 cells (n=4, 6 replicates each), (E) HEK293T cells (n=4, 6 replicates each), (F) HeLa cells (n=4, 6 replicates each), and (G) CFBE (*CFTR* ΔF508/ΔF508) cells (n=4, 6 replicates each). All panels, Error bars indicate mean ± SE. UnD= Undetected by RT-qPCR.

**Fig. S16A.**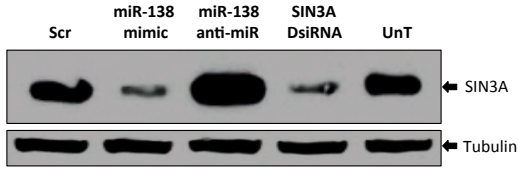**Fig. S16C.**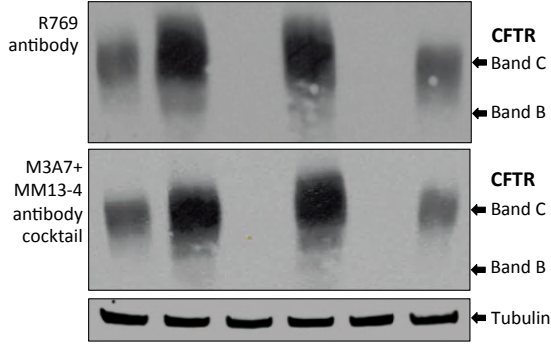**Fig. S16E.**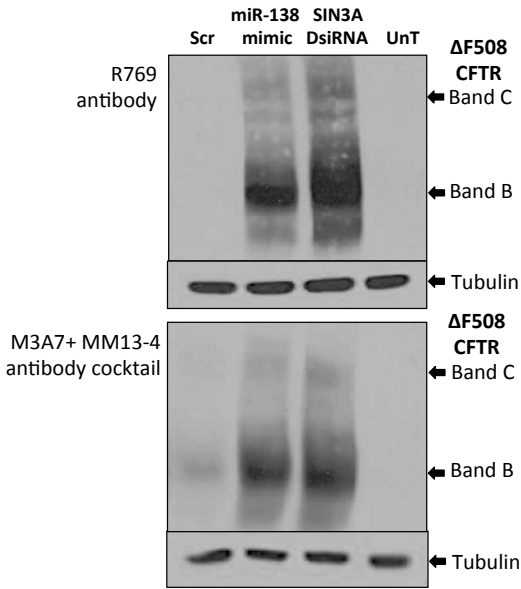**Fig. S16B.**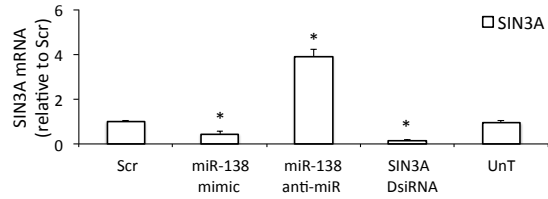**Fig. S16D.**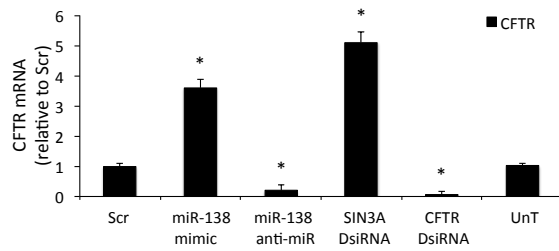**Fig. S16F.**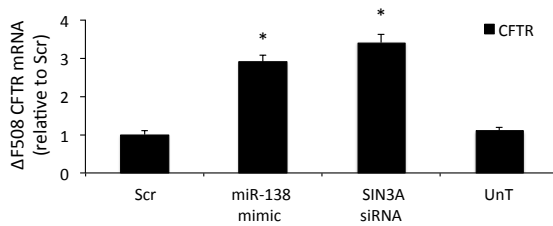

**Fig. S16.** Persistence of oligonucleotide effects 2 weeks post-transfection. (A) Representative SIN3A immunoblot in Calu-3 air-liquid interface (ALI) cultures 14 days post-transfection (6 replicates). (B) Relative SIN3A mRNA abundance in Calu-3 ALI cultures 14 days post transfection (6 replicates). (C) Representative CFTR immunoblot in Calu-3 ALI cultures 14 days post-transfection (8 replicates). PVDF membrane was first probed with R769 antibody (top panel), stripped and re-probed with the M3A7+MM13-4 antibody cocktail (bottom panel). (D) Relative *CFTR* mRNA abundance in Calu-3 ALI cultures 14 days post transfection (6 replicates). (E) Representative CFTR immunoblot in CFBE (*CFTR* ΔF508/ΔF508) ALI cultures 14 days post-transfection (6 replicates) (top panel-R769 antibody, bottom panel-M3A7+MM13-4 antibody cocktail). (F) Relative *CFTR* mRNA abundance in CFBE ALI cultures 14 days post-transfection (6 replicates). All panels, Error bars indicate mean ± SE. \**P* < 0.01, relative to Scr.

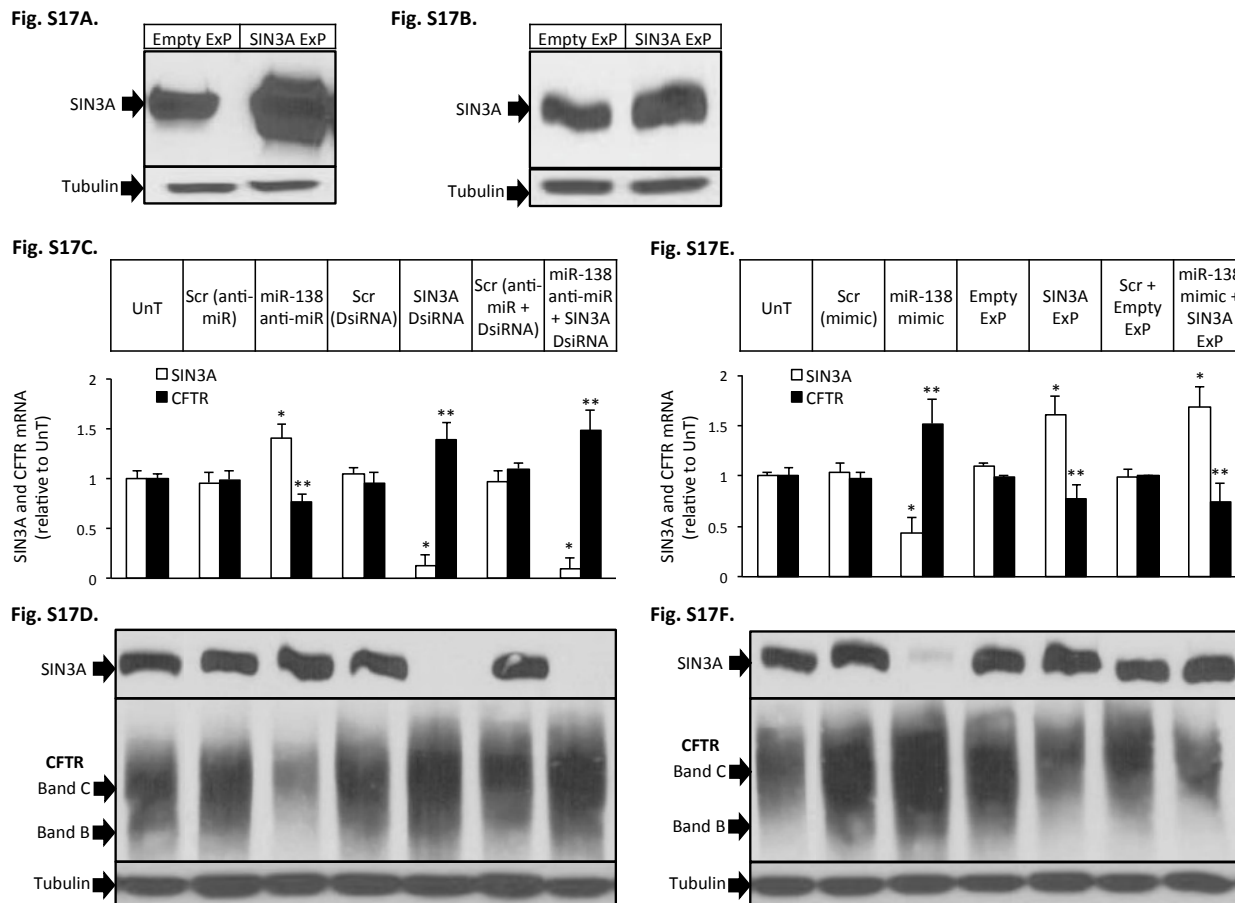

**Fig. S17.** Epistatic relationship between SIN3A and miR-138. (A) SIN3A expression in HEK293T cells assessed by western blot 48 hrs post transfection with empty vector (Empty ExP) or SIN3A cDNA (SIN3A ExP). (B) SIN3A expression in Calu-3 cells assessed by western blot 48 hrs post transfection with empty vector or SIN3A cDNA. (C and E) Relative *SIN3A* and *CFTR* mRNA levels in Calu-3 cells 48 hrs post transfection (3 replicates). (D and F) Representative *SIN3A* and *CFTR* immunoblots in Calu-3 cells 48 hrs post transfection (3 replicates). All panels, Error bars indicate mean  $\pm$  SE. \* $P < 0.05$ , relative to UnT (SIN3A); \*\* $P < 0.05$ , relative to UnT (CFTR). ExP denotes expression plasmid.

**Table S1. Expression of microRNAs in human airway epithelia**

AB TaqMan® Low Density MicroRNA Array (TLDA) was performed on 4 human non-CF primary well-differentiated airway epithelial cultures. With a C<sub>q</sub> cut-off <30, 115 miRNAs were deemed expressed in the human airway epithelium. Of these, 31 miRNAs (**bold**) were highly expressed with an average C<sub>q</sub> value <25. MiRNAs arranged in order of their decreasing average abundance.

| microRNA-(probeset ID)        | Cq<br>(Donor#1) | Cq<br>(Donor#2) | Cq<br>(Donor#3) | Cq<br>(Donor#4) |
|-------------------------------|-----------------|-----------------|-----------------|-----------------|
| <b>hsa-miR-30a*-4373062</b>   | 24.6            | 24.2            | 24.2            | 24.4            |
| <b>hsa-miR-186-4395396</b>    | 24.0            | 23.6            | 24.0            | 23.9            |
| <b>hsa-miR-24-4373072</b>     | 21.2            | 20.8            | 21.2            | 20.8            |
| <b>hsa-miR-200c-4395411</b>   | 21.2            | 20.9            | 20.8            | 21.3            |
| <b>hsa-miR-484-4381032</b>    | 23.7            | 23.3            | 24.0            | 23.9            |
| <b>hsa-miR-191-4395410</b>    | 22.0            | 21.4            | 21.5            | 21.5            |
| <b>hsa-miR-16-4373121</b>     | 22.0            | 22.1            | 22.6            | 22.0            |
| <b>hsa-miR-30e-4395334</b>    | 23.2            | 23.1            | 23.7            | 23.7            |
| <b>hsa-miR-17-4395419</b>     | 24.3            | 23.5            | 23.8            | 23.9            |
| <b>hsa-miR-106a-4395280</b>   | 24.1            | 23.2            | 23.7            | 23.8            |
| <b>hsa-miR-378-4395354</b>    | 24.6            | 23.8            | 24.4            | 24.6            |
| <b>hsa-miR-138-4395395</b>    | 24.0            | 24.4            | 23.6            | 23.5            |
| <b>hsa-miR-19b-4373098</b>    | 23.2            | 22.4            | 22.4            | 23.1            |
| <b>hsa-miR-31-4395390</b>     | 23.0            | 22.1            | 22.8            | 21.9            |
| <b>hsa-miR-30c-4373060</b>    | 23.0            | 22.2            | 22.0            | 23.1            |
| <b>hsa-miR-200a-4378069</b>   | 24.1            | 23.3            | 23.0            | 24.1            |
| <b>hsa-miR-222-4395387</b>    | 19.7            | 19.6            | 20.5            | 20.8            |
| <b>hsa-miR-768-3p-4395188</b> | 24.0            | 24.3            | 24.8            | 25.5            |
| <b>hsa-miR-768-3p-4395188</b> | 24.0            | 24.0            | 24.6            | 25.4            |
| <b>hsa-miR-203-4373095</b>    | 25.0            | 24.7            | 23.8            | 23.6            |
| <b>hsa-miR-29a-4395223</b>    | 22.2            | 21.7            | 21.8            | 23.2            |
| <b>hsa-miR-200b-4395362</b>   | 22.6            | 21.6            | 21.0            | 22.5            |
| <b>hsa-miR-141-4373137</b>    | 24.4            | 23.4            | 23.2            | 24.8            |
| <b>hsa-miR-30b-4373290</b>    | 23.5            | 22.7            | 22.0            | 23.7            |
| <b>hsa-miR-26b-4395167</b>    | 25.6            | 24.4            | 24.1            | 25.7            |
| <b>hsa-miR-26a-4395166</b>    | 24.7            | 23.1            | 22.8            | 24.5            |
| <b>hsa-miR-21-4373090</b>     | 24.2            | 22.6            | 22.7            | 24.4            |
| <b>hsa-miR-429-4373203</b>    | 25.7            | 23.8            | 23.5            | 24.8            |
| <b>hsa-miR-449a-4373207</b>   | 23.3            | 21.9            | 22.6            | 21.0            |
| <b>hsa-miR-146a-4373132</b>   | 22.7            | 21.8            | 26.9            | 23.5            |
| hsa-miR-574-3p-4395460        | 25.4            | 24.9            | 25.0            | 25.1            |
| hsa-miR-125a-5p-4395309       | 24.9            | 25.1            | 25.2            | 25.5            |



|                         |      |      |      |      |
|-------------------------|------|------|------|------|
| hsa-miR-151-3p-4395365  | 25.5 | 25.1 | 25.4 | 25.2 |
| hsa-miR-223-4395406     | 26.3 | 24.9 | 26.1 | 24.5 |
| hsa-let-7g-4395393      | 26.1 | 25.2 | 24.5 | 25.9 |
| hsa-let-7e-4395517      | 26.6 | 25.6 | 24.0 | 25.9 |
| hsa-miR-30a-4373061     | 25.8 | 25.1 | 25.5 | 26.0 |
| hsa-miR-135b-4395372    | 26.5 | 25.5 | 25.5 | 25.0 |
| hsa-miR-135a*-4395343   | 25.5 | 25.8 | 25.5 | 26.0 |
| hsa-miR-342-3p-4395371  | 26.2 | 25.3 | 25.7 | 25.8 |
| hsa-miR-27a-4373287     | 26.8 | 25.3 | 25.3 | 25.9 |
| hsa-miR-454-4395434     | 26.2 | 25.4 | 25.8 | 25.9 |
| hsa-miR-19a-4373099     | 26.3 | 25.2 | 25.8 | 26.4 |
| hsa-miR-34c-5p-4373036  | 27.7 | 25.1 | 23.8 | 27.1 |
| hsa-miR-320-4395388     | 25.8 | 26.1 | 26.2 | 25.9 |
| hsa-miR-449b-4381011    | 27.7 | 25.9 | 25.6 | 24.8 |
| hsa-miR-29c-4395171     | 26.2 | 25.5 | 25.6 | 27.0 |
| hsa-miR-20a-4373286     | 27.3 | 25.6 | 25.1 | 26.8 |
| hsa-miR-345-4395297     | 26.7 | 26.3 | 25.7 | 26.1 |
| hsa-miR-374b-4381045    | 26.8 | 26.0 | 25.5 | 26.5 |
| hsa-miR-149-4395366     | 27.3 | 27.4 | 25.1 | 25.5 |
| hsa-miR-331-3p-4373046  | 26.9 | 26.2 | 26.2 | 26.3 |
| hsa-miR-93-4373302      | 27.9 | 26.1 | 25.7 | 26.8 |
| hsa-miR-132-4373143     | 26.7 | 26.1 | 26.5 | 27.3 |
| hsa-miR-140-5p-4373374  | 26.8 | 26.0 | 26.4 | 27.5 |
| hsa-miR-28-3p-4395557   | 26.8 | 26.7 | 26.5 | 26.8 |
| hsa-miR-93*-4395250     | 27.1 | 26.8 | 27.0 | 26.1 |
| hsa-miR-146b-5p-4373178 | 26.6 | 26.4 | 27.3 | 27.1 |
| hsa-miR-34a-4395168     | 27.6 | 26.5 | 25.7 | 27.7 |
| hsa-miR-590-5p-4395176  | 27.2 | 26.5 | 26.9 | 27.3 |
| hsa-miR-30d-4373059     | 27.3 | 26.4 | 26.9 | 27.8 |
| hsa-miR-532-5p-4380928  | 28.0 | 26.6 | 26.8 | 27.2 |
| hsa-miR-30d-4373059     | 27.4 | 26.5 | 27.0 | 27.8 |
| hsa-miR-374a-4373028    | 28.0 | 26.9 | 26.6 | 27.5 |
| hsa-miR-34b*-4373037    | 27.7 | 26.4 | 26.1 | 29.2 |
| hsa-miR-422a-4395408    | 27.7 | 26.7 | 27.3 | 27.6 |
| hsa-miR-125b-4373148    | 28.5 | 26.9 | 25.5 | 28.5 |
| hsa-miR-708-4395452     | 28.2 | 26.7 | 27.3 | 27.3 |
| hsa-miR-801-4395183     | 27.6 | 27.4 | 27.2 | 27.6 |
| hsa-miR-801-4395183     | 27.5 | 27.4 | 27.4 | 27.9 |
| hsa-miR-106b-4373155    | 28.6 | 27.4 | 26.7 | 27.6 |
| hsa-miR-660-4380925     | 28.3 | 27.0 | 27.2 | 28.0 |
| hsa-miR-99a-4373008     | 29.1 | 27.4 | 25.9 | 28.3 |
| hsa-miR-150-4373127     | 27.5 | 27.1 | 26.6 | 29.4 |
| hsa-miR-100-4373160     | 29.0 | 27.8 | 26.0 | 28.2 |

|                        |      |      |      |      |
|------------------------|------|------|------|------|
| hsa-miR-7-1*-4381118   | 27.4 | 27.9 | 27.8 | 28.1 |
| hsa-miR-205-4373093    | 29.8 | 27.8 | 26.5 | 27.3 |
| hsa-miR-200a*-4373273  | 27.7 | 27.8 | 28.1 | 27.8 |
| hsa-miR-224-4395210    | 28.7 | 27.0 | 27.9 | 28.0 |
| hsa-miR-195-4373105    | 28.5 | 27.5 | 27.8 | 28.1 |
| hsa-miR-425-4380926    | 28.9 | 27.9 | 27.6 | 28.1 |
| hsa-miR-625*-4395543   | 27.5 | 28.1 | 28.2 | 28.6 |
| hsa-miR-27b-4373068    | 29.2 | 27.8 | 27.1 | 28.6 |
| hsa-miR-152-4395170    | 29.1 | 27.6 | 27.2 | 29.1 |
| hsa-miR-218-4373081    | 28.7 | 26.8 | 28.7 | 28.9 |
| hsa-let-7b-4395446     | 29.8 | 28.5 | 26.2 | 28.7 |
| hsa-miR-148a-4373130   | 29.5 | 28.1 | 27.2 | 28.7 |
| hsa-miR-182-4395445    | 28.7 | 29.0 | 28.2 | 28.1 |
| hsa-miR-210-4373089    | 29.2 | 28.4 | 28.2 | 28.4 |
| hsa-miR-628-5p-4395544 | 28.6 | 28.2 | 28.4 | 29.2 |
| hsa-miR-103-4373158    | 29.9 | 28.4 | 27.3 | 28.8 |
| hsa-miR-92a-4395169    | 29.5 | 28.9 | 27.7 | 28.8 |
| hsa-miR-15b-4373122    | 30.1 | 28.7 | 27.3 | 29.0 |
| hsa-miR-34a*-4395427   | 28.3 | 29.1 | 29.0 | 29.0 |
| hsa-miR-375-4373027    | 30.1 | 28.5 | 27.6 | 29.2 |
| hsa-miR-221-4373077    | 30.5 | 28.5 | 27.3 | 29.4 |
| hsa-miR-340-4395369    | 30.1 | 28.2 | 27.8 | 29.6 |
| hsa-miR-192-4373108    | 28.9 | 28.5 | 29.3 | 29.3 |
| hsa-miR-452-4395440    | 29.2 | 29.1 | 29.0 | 28.7 |
| hsa-let-7a-4373169     | 30.5 | 28.9 | 27.1 | 29.8 |
| hsa-miR-25-4373071     | 29.5 | 29.1 | 28.5 | 29.2 |
| hsa-miR-598-4395179    | 30.0 | 28.9 | 28.1 | 29.9 |
| hsa-miR-886-3p-4395305 | 28.1 | 28.7 | 29.6 | 30.4 |
| hsa-miR-744-4395435    | 30.3 | 29.0 | 28.2 | 29.3 |
| hsa-miR-126-4395339    | 29.3 | 29.7 | 29.6 | 28.4 |
| hsa-let-7d-4395394     | 30.2 | 29.4 | 27.6 | 29.8 |
| hsa-miR-532-3p-4395466 | 29.9 | 28.7 | 28.4 | 30.0 |
| hsa-miR-28-5p-4373067  | 30.0 | 29.0 | 28.4 | 29.8 |
| hsa-miR-339-3p-4395295 | 29.0 | 29.0 | 29.8 | 29.7 |
| hsa-miR-193b-4395478   | 29.0 | 31.5 | 29.7 | 27.6 |
| hsa-miR-99b-4373007    | 30.1 | 29.7 | 28.4 | 29.8 |
| hsa-miR-200b*-4395385  | 30.2 | 29.8 | 28.8 | 29.7 |
| hsa-miR-491-5p-4381053 | 30.9 | 29.6 | 29.5 | 29.6 |
| hsa-miR-188-5p-4395431 | 29.6 | 30.0 | 30.1 | 30.1 |

**Table S2. CFTR-Associated Gene Network (16, 25-28)**

This gene list was curated from the published literature (16, 25-28) and includes gene products as identified as directly or indirectly involved in CFTR biosynthesis.

| <b>Gene Symbol</b> | <b>Description</b>                                                                | <b>Gene Symbol</b> | <b>Description</b>                                                |
|--------------------|-----------------------------------------------------------------------------------|--------------------|-------------------------------------------------------------------|
| MARCH2             | membrane-associated ring finger (C3HC4) 2                                         | LMO7               | LIM domain 7                                                      |
| MARCH3             | membrane-associated ring finger (C3HC4) 3                                         | LRRFIP2            | leucine rich repeat (in FLII) interacting protein 2               |
| MARCH5             | membrane-associated ring finger (C3HC4) 5                                         | MARCKSL1           | MARCKS-like 1                                                     |
| SEPT1              | Septin-1                                                                          | MDM2               | Mdm2 p53 binding protein homolog (mouse)                          |
| SEPT2              | Septin-2                                                                          | MLP                | membrane lipoprotein precursor                                    |
| SEPT3              | Septin-3                                                                          | MMS19              | MMS19 nucleotide excision repair homolog ( <i>S. cerevisiae</i> ) |
| SEPT6              | Septin-6                                                                          | MMS19L             | MMS19-like (MET18 homolog, <i>S. cerevisiae</i> )                 |
| A2M                | alpha-2-macroglobulin homologue                                                   | MS4A5              | membrane-spanning 4-domains, subfamily A, member 5                |
| ADCY8              | adenylate cyclase 8 (brain)                                                       | MTAP4              | microtubule-associated protein 4                                  |
| AHA1               | Hsp90 co-chaperone AHA1                                                           | MUC13              | mucin 13, cell surface associated                                 |
| AHSA1              | AHA1, activator of heat shock protein ATPase homolog 1 (yeast)                    | MUC2               | mucin 2, oligomeric mucus/gel-forming                             |
| AHSA2              | AHA1, activator of heat shock 90kDa protein ATPase homolog 2 (yeast)              | NEDD4              | similar to E3 ubiquitin-protein ligase Nedd-4                     |
| AIFM1              | apoptosis-inducing factor, mitochondrion-associated, 1                            | NEDD4L             | Nedd4 protein                                                     |
| AKAP6              | A kinase (PRKA) anchor protein 6                                                  | NKX2-1             | NK2 homeobox 1                                                    |
| AMFR               | similar to autocrine motility factor receptor; autocrine motility factor receptor | NPEPPS             | aminopeptidase puromycin sensitive                                |
| ANO1               | anoctamin 1, calcium activated chloride channel                                   | NRIP3              | nuclear receptor interacting protein 3                            |
| AP1B1              | adaptor protein complex AP-1, beta 1 subunit                                      | NUAK1              | NUAK family, SNF1-like kinase, 1                                  |
| APC                | adenomatous polyposis coli                                                        | OPRS1              | opioid receptor, sigma 1                                          |
| APOA2              | apolipoprotein A-II                                                               | P4HA1              | prolyl 4-hydroxylase, alpha polypeptide I                         |
| AQP1               | aquaporin 1 (Colton blood                                                         | PACRG              | PARK2 co-regulated                                                |

|         |                                                                                  |         |                                                              |
|---------|----------------------------------------------------------------------------------|---------|--------------------------------------------------------------|
|         | group)                                                                           |         |                                                              |
| ARF4    | ADP-ribosylation factor 4                                                        | PARC    | DNA topoisomerase 4 subunit A                                |
| ARIH1   | ariadne homolog, ubiquitin-conjugating enzyme E2 binding protein, 1 (Drosophila) | PARK10  | Parkinson disease 10                                         |
| ATAD3A  | ATPase family, AAA domain containing 3A                                          | PARK12  | Parkinson disease (X-linked) 12                              |
| ATP2A1  | ATPase, Ca <sup>++</sup> transporting, cardiac muscle, slow twitch 2             | PARK2   | Parkinson disease (autosomal recessive, juvenile) 2, parkin  |
| ATP2A2  | ATPase, Ca <sup>++</sup> transporting, cardiac muscle, slow twitch 2             | PARK3   | Parkinson disease (autosomal dominant, Lewy body) 3          |
| ATP2A3  | ATPase, Ca <sup>++</sup> transporting, ubiquitous                                | PARK4   | Parkinson disease (autosomal dominant, Lewy body) 4          |
| ATP6V1A | ATPase, H <sup>+</sup> transporting, lysosomal 70kDa, V1 subunit A               | PARK7   | Parkinson disease (autosomal recessive, early onset) 7       |
| ATXN2L  | ataxin 2-like                                                                    | PCDH15  | protocadherin 15                                             |
| B3GNT9  | UDP-GlcNAc:betaGal beta-1,3-N-acetylglucosaminyltransferase 9                    | PCDHB8  | protocadherin beta 8                                         |
| BAG1    | BCL2-associated athanogene                                                       | PCMT1   | protein-L-isoaspartate (D-aspartate) O-methyltransferase 1   |
| BAG2    | BCL2-associated athanogene 2                                                     | PDCD6   | aryl-hydrocarbon receptor repressor; programmed cell death 6 |
| BAG3    | BCL2-associated athanogene 3                                                     | PDCD8   | programmed cell death 8 (apoptosis-inducing factor)          |
| BCR     | breakpoint cluster region                                                        | PDDC1   | Parkinson disease 7 domain containing 1                      |
| BIRC6   | baculoviral IAP repeat-containing 6                                              | PDE8A   | phosphodiesterase 8A                                         |
| C6orf48 | chromosome 6 open reading frame 48; small nucleolar RNA, C/D box 52              | PDZK1   | PDZ domain containing 1                                      |
| C8orf55 | chromosome 8 open reading frame 55                                               | PHLDB3  | pleckstrin homology-like domain, family B, member 3          |
| C9ORF10 | similar to Family with sequence similarity 120A                                  | PKC     | protein kinase C                                             |
| CAL     | Transcription factor CAULIFLOWER                                                 | PKD1    | polycystic kidney disease 1 homolog (human)                  |
| CALU    | calumenin                                                                        | PLD     | phospholipase D1, phosphatidylcholine-specific               |
| CANX    | calnexin                                                                         | PLD2    | phospholipase D2                                             |
| CAPNS1  | calpain, small subunit 1                                                         | PLEKHA6 | pleckstrin homology domain containing, family A member 6     |
| CAPRN1  | cell cycle associated protein 1                                                  | PPIB    | peptidylprolyl isomerase B (cyclophilin B)                   |
| CBL     | Cas-Br-M (murine) ecotropic retroviral transforming sequence                     | PPID    | peptidylprolyl isomerase D                                   |

|             |                                                                                                           |         |                                                                         |
|-------------|-----------------------------------------------------------------------------------------------------------|---------|-------------------------------------------------------------------------|
| CCT1        | T-complex protein 1, alpha subunit                                                                        | PPIL2   | peptidylprolyl isomerase (cyclophilin)-like 2                           |
| CCT3        | chaperonin containing TCP1, subunit 3 (gamma)                                                             | PPP2CA  | protein phosphatase 2 (formerly 2A), catalytic subunit, alpha isoform   |
| CCT4        | chaperonin containing Tcp1, subunit 4 (delta)                                                             | PPP2CB  | protein phosphatase 2 (formerly 2A), catalytic subunit, beta isoform    |
| CCT5        | chaperonin containing TCP1, subunit 5 (epsilon)                                                           | PPP2R1A | protein phosphatase 2, regulatory subunit A, alpha isoform              |
| CD36        | CD36 molecule (thrombospondin receptor)                                                                   | PPP2R1B | protein phosphatase 2 (formerly 2A), regulatory subunit A, beta isoform |
| CD46        | CD46 molecule, complement regulatory protein                                                              | PPP2R2A | protein phosphatase 2, regulatory subunit B, alpha                      |
| CD59        | CD59 molecule, complement regulatory protein                                                              | PPP2R2B | protein phosphatase 2 (formerly 2A), regulatory subunit B, beta isoform |
| CDC37       | cell division cycle 37 homolog (S. cerevisiae)                                                            | PRG4    | proteoglycan 4                                                          |
| CDH1        | cadherin 1                                                                                                | PRKAA1  | protein kinase, AMP-activated, alpha 1 catalytic subunit                |
| CDK5R1      | cyclin-dependent kinase 5, regulatory subunit 1 (p35)                                                     | PRKAA2  | protein kinase, AMP-activated, alpha 2 catalytic subunit                |
| CEP170      | centrosomal protein 170kDa                                                                                | PRKAB1  | protein kinase, AMP-activated, beta 1 non-catalytic subunit             |
| CFL1        | cofilin 1 (non-muscle)                                                                                    | PRKAB2  | protein kinase, AMP-activated, beta 2 non-catalytic subunit             |
| <b>CFTR</b> | <b>cystic fibrosis transmembrane conductance regulator, ATP-binding cassette (sub-family C, member 7)</b> | PRKAG1  | protein kinase, AMP-activated, gamma 1 non-catalytic subunit            |
| CLCA1       | chloride channel accessory 1                                                                              | PRKAG2  | protein kinase, AMP-activated, gamma 2 non-catalytic subunit            |
| CLINT1      | hypothetical protein MGC97891                                                                             | PRKAG3  | protein kinase, AMP-activated, gamma 3 non-catalytic subunit            |
| CLN2        | G1/S-specific cyclin CLN2                                                                                 | PRKAR2A | protein kinase, cAMP-dependent, regulatory, type II, alpha              |
| CLTA        | clathrin, light chain (Lca)                                                                               | PRKDC   | protein kinase, DNA-activated, catalytic polypeptide                    |
| CLTCL1      | clathrin, heavy chain-like 1                                                                              | PRP19   | PRP19/PSO4 pre-mRNA processing factor 19 homolog (S. cerevisiae)        |
| COPB        | coatamer protein complex, subunit beta                                                                    | PSAP    | prosaposin                                                              |
| COPB1       | coatamer protein complex, subunit beta 1                                                                  | PSENN   | presenilin enhancer 2 homolog (C. elegans)                              |
| COPB2       | coatamer protein complex, subunit beta 2                                                                  | PSMA1   | proteasome (prosome, macropain) subunit, alpha type, 1                  |
| CSE1L       | CSE1 chromosome segregation 1-like (yeast)                                                                | PSMA2   | proteasome (prosome, macropain) subunit, alpha type, 2                  |

|         |                                                                    |         |                                                                 |
|---------|--------------------------------------------------------------------|---------|-----------------------------------------------------------------|
| CSRP3   | cysteine and glycine-rich protein 3 (cardiac LIM protein)          | PSMB1   | proteasome (prosome, macropain) subunit, beta type, 1           |
| CSTB    | cystatin B (stefin B)                                              | PSMB3   | proteasome (prosome, macropain) subunit, beta type, 3;          |
| CUL7    | cullin 7                                                           | PSMB4   | proteasome (prosome, macropain) subunit, beta type, 4           |
| CYB5B   | cytochrome b5 type B (outer mitochondrial membrane)                | PSMC3IP | PSMC3 interacting protein                                       |
| CYPB    | Peptidyl-prolyl cis-trans isomerase                                | PSMC4   | proteasome (prosome, macropain) 26S subunit, ATPase, 4          |
| DAB2    | disabled homolog 2, mitogen-responsive phosphoprotein (Drosophila) | PSMD11  | proteasome (prosome, macropain) 26S subunit, non-ATPase, 11     |
| DCLK1   | doublecortin-like kinase 1                                         | PSMD2   | proteasome (prosome, macropain) 26S subunit, non-ATPase, 2      |
| DERL1   | Der1-like domain family, member 1                                  | PSME2   | proteasome (prosome, macropain) activator subunit 2 (PA28 beta) |
| DNAJA1  | DnaJ (Hsp40) homolog, subfamily A, member 1                        | PTGES3  | inactive progesterone receptor, 23 kD                           |
| DNAJA2  | DnaJ (Hsp40) homolog, subfamily A, member 2                        | PTPRC   | protein tyrosine phosphatase, receptor type, C                  |
| DNAJA3  | DnaJ (Hsp40) homolog, subfamily A, member 3                        | RAN     | RAN, member RAS oncogene family                                 |
| DNAJB1  | DnaJ (Hsp40) homolog, subfamily B, member 1                        | RANBP1  | similar to RAN binding protein 1; RAN binding protein 1         |
| DNAJB12 | DnaJ (Hsp40) homolog, subfamily B, member 12                       | RCN1    | reticulocalbin 1, EF-hand calcium binding domain                |
| DNAJB2  | DnaJ (Hsp40) homolog, subfamily B, member 2                        | RCN2    | Regulator of calcineurin 2                                      |
| DNAJB4  | DnaJ (Hsp40) homolog, subfamily B, member 4                        | REPS1   | RALBP1 associated Eps domain containing 1                       |
| DNAJB5  | DnaJ (Hsp40) homolog, subfamily B, member 5                        | RGAG4   | retrotransposon gag domain containing 4                         |
| DNAJC27 | DnaJ (Hsp40) homolog, subfamily C, member 27                       | RHOJ    | ras homolog gene family, member J                               |
| DNAJC3  | DnaJ (Hsp40) homolog, subfamily C, member 3                        | RHOQ    | ras homolog gene family, member Q                               |
| DNAJC5  | DnaJ (Hsp40) homolog, subfamily C, member 5                        | RHOT1   | ras homolog gene family, member T1                              |
| DNAJC7  | DnaJ (Hsp40) homolog, subfamily C, member 7                        | RMA1    | Probable folylpolyglutamate synthase                            |
| DNCH1   | dynein, cytoplasmic, heavy polypeptide 1                           | RNF128  | ring finger protein 128                                         |
| DPYSL2  | dihydropyrimidinase-like 2                                         | RNF5    | ring finger protein 5                                           |
| DTL     | denticleless homolog                                               | RPS27A  | ribosomal protein S27a                                          |

|         |                                                                                         |          |                                                                                               |
|---------|-----------------------------------------------------------------------------------------|----------|-----------------------------------------------------------------------------------------------|
|         | (Drosophila)                                                                            |          |                                                                                               |
| DYNC1H1 | dynein, cytoplasmic 1, heavy chain 1                                                    | RRAS     | related RAS viral (r-ras) oncogene homolog                                                    |
| EDG4    | endothelial differentiation, lysophosphatidic acid G-protein-coupled receptor, 4        | RS1      | retinoschisin 1                                                                               |
| EFHA1   | EF-hand domain family, member A1                                                        | RSC1A1   | regulatory solute carrier protein, family 1, member 1                                         |
| EMD     | emerin                                                                                  | RTL1     | retrotransposon-like 1                                                                        |
| ENTHD1  | ENTH domain containing 1                                                                | RUVBL1   | RuvB-like 1 (E. coli)                                                                         |
| EPS8    | epidermal growth factor receptor pathway substrate 8                                    | RUVBL2   | RuvB-like 2 (E. coli)                                                                         |
| ERBB2   | v-erb-b2 erythroblastic leukemia viral oncogene homolog 2                               | RYK      | receptor-like tyrosine kinase                                                                 |
| EXO1    | Exodeoxyribonuclease 1                                                                  | RYR2     | ryanodine receptor 2, cardiac                                                                 |
| FAM120A | Constitutive coactivator of PPAR-gamma-like protein 1                                   | RYR3     | ryanodine receptor 3                                                                          |
| FAM83A  | family with sequence similarity 83, member A                                            | S100A6   | S100 calcium binding protein A6                                                               |
| FARSA   | phenylalanyl-tRNA synthetase, alpha subunit                                             | S100A7   | S100 calcium binding protein A7                                                               |
| FARSB   | phenylalanyl-tRNA synthetase, beta subunit                                              | S100A9   | S100 calcium binding protein A9                                                               |
| FAT1    | FAT tumor suppressor homolog 1 (Drosophila)                                             | SAFB     | scaffold attachment factor B                                                                  |
| FAT2    | FAT tumor suppressor homolog 2 (Drosophila)                                             | SAR1B    | SAR1 homolog B (S. cerevisiae)                                                                |
| FCNA    | ficolin A                                                                               | SEC31A   | SEC31 homolog A (S. cerevisiae)                                                               |
| FKBP8   | FK506 binding protein 8, 38kDa                                                          | SEC61A1  | Sec61 alpha 1 subunit (S. cerevisiae)                                                         |
| FLOT2   | flotillin 2                                                                             | SEC61A2  | dehydrogenase E1 and transketolase domain containing 1; Sec61 alpha 2 subunit (S. cerevisiae) |
| FN1     | fibronectin 1                                                                           | SERP1    | stress-associated endoplasmic reticulum protein 1                                             |
| GNA11   | guanine nucleotide binding protein (G protein), alpha 11 (Gq class)                     | SFXN3    | sideroflexin 3                                                                                |
| GNAI2   | guanine nucleotide binding protein (G protein), alpha inhibiting activity polypeptide 2 | SH3BGRL2 | SH3 domain binding glutamic acid-rich protein like 2                                          |
| GNB2L1  | guanine nucleotide binding protein (G protein), beta polypeptide 2-like 1               | SHROOM3  | shroom family member 3                                                                        |
| GOPC    | golgi associated PDZ and coiled-coil motif containing                                   | SIAH1    | seven in absentia homolog 1 (Drosophila)                                                      |

|            |                                                                                                                            |              |                                                                                       |
|------------|----------------------------------------------------------------------------------------------------------------------------|--------------|---------------------------------------------------------------------------------------|
| GRIP1      | glutamate receptor interacting protein 1                                                                                   | <b>SIN3A</b> | <b>SIN3 homolog A, transcription regulator (yeast)</b>                                |
| GRN        | granulin                                                                                                                   | SLC9A2       | solute carrier family 9 (sodium/hydrogen exchanger), member 2                         |
| GRP78      | glucose-regulated protein 78kDa                                                                                            | SLC9A3R1     | similar to solute carrier family 9 (sodium/hydrogen exchanger), isoform 3 regulator 1 |
| GUCY2D     | guanylate cyclase 2D, membrane (retina-specific)                                                                           | SLC9A3R2     | solute carrier family 9 (sodium/hydrogen exchanger), member 3 regulator 2             |
| HACE1      | HECT domain and ankyrin repeat containing, E3 ubiquitin protein ligase 1                                                   | SMURF1       | SMAD specific E3 ubiquitin protein ligase 1                                           |
| HAX1       | HCLS1 associated X-1; silica-induced gene 111                                                                              | SNX26        | sorting nexin 26                                                                      |
| HCLS1      | hematopoietic cell specific Lyn substrate 1                                                                                | SNX4         | sorting nexin 4                                                                       |
| HOP        | Halorhodopsin                                                                                                              | SNX9         | sorting nexin 9                                                                       |
| HOPX       | odd homeobox 1 protein                                                                                                     | SOD2         | Superoxide dismutase [Mn], mitochondrial                                              |
| HSC70      | heat shock protein 70 cognate                                                                                              | SORL1        | sortilin-related receptor, LDLR class A repeats-containing                            |
| HSD3B1     | hydroxy-delta-5-steroid dehydrogenase, 3 beta- and steroid delta-isomerase 1                                               | SPTLC1       | serine palmitoyltransferase, long chain base subunit 1                                |
| HSP22      | Heat shock protein 22; Heat shock gene 67Bb                                                                                | SQRDL        | sulfide quinone reductase-like (yeast)                                                |
| HSP25      | heat shock protein 25                                                                                                      | SRA1         | steroid receptor RNA activator 1                                                      |
| HSP27      | Heat shock protein 27                                                                                                      | ST13         | suppression of tumorigenicity 13 (colon carcinoma) (Hsp70 interacting protein)        |
| HSP47      | heat shock protein 47                                                                                                      | STAM2        | signal transducing adaptor molecule (SH3 domain and ITAM motif) 2                     |
| HSP60      | Heat shock protein 60, mitochondrial                                                                                       | STIP1        | stress-induced-phosphoprotein 1                                                       |
| HSPA1A     | heat shock 70kDa protein 1A                                                                                                | STUB1        | STIP1 homology and U-box containing protein 1                                         |
| HSP90AA1   | heat shock protein 90, alpha (cytosolic), class A member 1                                                                 | STX1A        | syntaxin 1A (brain)                                                                   |
| HSP90AA2   | heat shock protein 90kDa alpha (cytosolic), class A member 2; heat shock protein 90kDa alpha (cytosolic), class A member 1 | SVIL         | supervillin                                                                           |
| HSP90AA4 P | heat shock protein 90kDa alpha (cytosolic), class A member 4 (pseudogene)                                                  | SYVN1        | synovial apoptosis inhibitor 1, synoviolin                                            |
| HSP90AA5 P | heat shock protein 90kDa alpha (cytosolic), class A member 5                                                               | TACSTD1      | tumor-associated calcium signal transducer 1                                          |



|               |                                                                           |        |                                                                                  |
|---------------|---------------------------------------------------------------------------|--------|----------------------------------------------------------------------------------|
|               | (pseudogene)                                                              |        |                                                                                  |
| HSP90AA6<br>P | heat shock protein 90kDa alpha (cytosolic), class A member 6 (pseudogene) | TAF4   | TAF4 RNA polymerase II, TATA box binding protein (TBP)-associated factor, 135kDa |
| HSP90AB1      | heat shock 90kDa protein 1, beta                                          | TCEB1  | transcription elongation factor B (SIII), polypeptide 1                          |
| HSP90AB2<br>P | heat shock protein 90kDa alpha (cytosolic), class B member 2 (pseudogene) | TCEB2  | transcription elongation factor B (SIII), polypeptide 2 (18kDa, elongin B)       |
| HSP90AB3<br>P | heat shock protein 90kDa alpha (cytosolic), class B member 3 (pseudogene) | TCLPA1 | t-complex lethal Pa1                                                             |
| HSP90AB4<br>P | heat shock protein 90kDa alpha (cytosolic), class B member 4 (pseudogene) | TCP1   | t-complex 1                                                                      |
| HSP90AB5<br>P | heat shock protein 90kDa alpha (cytosolic), class B member 5 (pseudogene) | TFG    | TRK-fused gene                                                                   |
| HSP90AB6<br>P | heat shock protein 90kDa alpha (cytosolic), class B member 6 (pseudogene) | TIAM1  | T-cell lymphoma invasion and metastasis 1                                        |
| HSP90B        | heat shock protein hsp90 beta                                             | TJP1   | tight junction protein 1 (zona occludens 1)                                      |
| HSP90B1       | heat shock protein 90kDa beta (Grp94), member 1                           | TJP3   | tight junction protein 3 (zona occludens 3)                                      |
| HSP90B2P      | heat shock protein 90kDa beta (Grp94), member 2 (pseudogene)              | TMEM43 | transmembrane protein 43                                                         |
| HSP90B3P      | heat shock protein 90kDa beta (Grp94), member 3 (pseudogene)              | TMOD3  | tropomodulin 3 (ubiquitous)                                                      |
| HSPA14        | heat shock 70kDa protein 14                                               | TNPO3  | transportin 3                                                                    |
| HSPA1A        | heat shock protein 1B; heat shock protein 1A; heat shock protein 1-like   | TPBG   | trophoblast glycoprotein                                                         |
| HSPA1B        | heat shock protein 1B; heat shock protein 1A; heat shock protein 1-like   | TPM3   | tropomyosin 3                                                                    |
| HSPA1L        | heat shock protein 1B; heat shock protein 1A; heat shock protein 1-like   | TPP1   | Polynucleotide 3'-phosphatase                                                    |
| HSPA2         | heat shock protein 2                                                      | TPT1   | tumor protein, translationally-controlled 1                                      |
| HSPA4         | heat shock 70kDa protein 4                                                | TRIM2  | tripartite motif-containing 2                                                    |
| HSPA5         | heat shock 70kDa protein 5 (glucose-regulated protein, 78kDa)             | TRIP12 | thyroid hormone receptor interactor 12                                           |

|          |                                                                           |         |                                                                          |
|----------|---------------------------------------------------------------------------|---------|--------------------------------------------------------------------------|
| HSPA6    | heat shock 70kDa protein 7 (HSP70B); heat shock 70kDa protein 6 (HSP70B') | TRN-SR  | Transportin-Serine/Arginine rich                                         |
| HSPA7    | heat shock 70kDa protein 7 (HSP70B); heat shock 70kDa protein 6 (HSP70B') | TRO     | trophinin                                                                |
| HSPA8    | similar to Heat shock cognate protein 70                                  | TROAP   | trophinin associated protein                                             |
| HSPA9    | heat shock 70kDa protein 9 (mortalin)                                     | TSG101  | tumor susceptibility gene 101                                            |
| HSPA9B   | heat shock protein, 74 kDa, A                                             | TTL5    | similar to tubulin tyrosine ligase-like family, member 5                 |
| HSPB1    | heat shock protein 1                                                      | UBB     | ubiquitin B                                                              |
| HSPB2    | heat shock 27kDa protein 2                                                | UBC     | ubiquitin C                                                              |
| HSPBP1   | hypothetical protein LOC100158355                                         | UBE2D1  | ubiquitin-conjugating enzyme E2D 1 (UBC4/5 homolog, yeast)               |
| HSPD1    | heat shock 60kDa protein 1 (chaperonin)                                   | UBE2D2  | ubiquitin-conjugating enzyme E2D 2 (UBC4/5 homolog, yeast)               |
| HSPH1    | heat shock 105kDa/110kDa protein 1                                        | UBE2D3  | ubiquitin-conjugating enzyme E2D 3 (UBC4/5 homolog, yeast)               |
| IFI44    | interferon-induced protein 44                                             | UBE2E1  | ubiquitin-conjugating enzyme E2E 1 (UBC4/5 homolog, yeast)               |
| IL1RAPL1 | interleukin 1 receptor accessory protein-like 1                           | UBE2J1  | ubiquitin-conjugating enzyme E2, J1 (UBC6 homolog, yeast)                |
| IL8      | interleukin 8                                                             | UBE2J2  | predicted gene 5801; ubiquitin-conjugating enzyme E2, J2 homolog (yeast) |
| IPO11    | importin 11                                                               | UBE2L3  | ubiquitin-conjugating enzyme E2L 3                                       |
| IPO7     | importin 7                                                                | UBE2L7P | ubiquitin-conjugating enzyme E2L 7 pseudogene                            |
| IPO9     | Importin 9                                                                | UBE2N   | ubiquitin-conjugating enzyme E2N (UBC13 homolog)                         |
| ITCH     | itchy homolog E3 ubiquitin protein ligase (mouse)                         | UBE2V1  | ubiquitin-conjugating enzyme E2 variant 1; transmembrane protein 189     |
| KAB      | KARP-1 binding protein 1                                                  | UBE3A   | ubiquitin protein ligase E3A                                             |
| KIF2A    | kinesin family member 2A                                                  | UBE4A   | ubiquitination factor E4A (UFD2 homolog)                                 |
| KIF3A    | kinesin family member 3A                                                  | UBE4B   | ubiquitination factor E4B                                                |
| KIF5B    | kinesin family member 5B                                                  | USP9X   | ubiquitin specific peptidase 9, X-linked                                 |
| KIF5C    | kinesin family member 5C                                                  | VCP     | valosin-containing protein                                               |
| KLC1     | kinesin light chain 1                                                     | VPS4A   | vacuolar protein sorting 4 homolog A (S. cerevisiae)                     |
| KLC3     | kinesin light chain 3                                                     | VPS4B   | vacuolar protein sorting 4B (yeast)                                      |
| KPNB1    | karyopherin (importin) beta 1                                             | WFS1    | Wolfram syndrome 1 (wolframin)                                           |
| LGALS3   | lectin, galactoside-binding, soluble, 3                                   | WSB1    | WD repeat and SOCS box-containing 1                                      |

|        |                                         |         |                                                        |
|--------|-----------------------------------------|---------|--------------------------------------------------------|
| LGALS4 | lectin, galactoside-binding, soluble, 4 | XPNPEP3 | X-prolyl aminopeptidase (aminopeptidase P) 3, putative |
| LIMA1  | LIM domain and actin binding 1          | XPO1    | exportin 1 (CRM1 homolog, yeast)                       |
| LIN7C  | lin-7 homolog C ( <i>C. elegans</i> )   | ZCCHC16 | zinc finger, CCHC domaincontaining 16                  |
| LMNA   | lamin A/C                               | ZMYM2   | zinc finger, MYM-type 2                                |

**Table S3. Enrichment significance for genes influencing CFTR biogenesis**

Differentially expressed genes from the miR-138 mimic or SIN3A DsiRNA microarray experiment in Calu-3 cells were cross-referenced with the CFTR-Associated Gene Network (Fig. 3C). Fisher's Exact Test was used to generate an enrichment score for genes in the CFTR-Associated Gene Network from either one or both array datasets and referenced against the background (expressed genes with fold change <1.5 and *P* value >0.05).

|                                                                                                                              | In CFTR-Associated Gene Network | Not in CFTR-Associated Gene Network | <i>P</i> value (Fisher's Exact Test) |
|------------------------------------------------------------------------------------------------------------------------------|---------------------------------|-------------------------------------|--------------------------------------|
| Background gene list (20,019 genes)                                                                                          | 196 (0.97%)                     | 19,823                              |                                      |
| Differentially expressed genes in the miR-138 mimic array (2,809 genes, <i>P</i> value <0.05)                                | 73 (2.6%)                       | 2,736                               | < 2.2e-16                            |
| Differentially expressed genes in the SIN3A DsiRNA array (2,840 genes, <i>P</i> value <0.05)                                 | 81 (2.9%)                       | 2,759                               | < 2.2e-16                            |
| Intersection of differentially expressed genes in the miR-138 mimic and SIN3A DsiRNA array (773 genes, <i>P</i> value <0.05) | 29 (3.8%)                       | 744                                 | 1.269e-08                            |

**Table S4. Genes in the CFTR-Associated Gene Network identified as differentially expressed in Calu-3 cells following miR-138 or SIN3A DsiRNA treatment**

The 125 genes in the CFTR-Associated Gene Network identified as differentially expressed in Calu-3 cells following treatment with SIN3A DsiRNA, miR-138 mimic, or negative control (Scr) (Fig. 3C). RNA was isolated from Calu-3 cells 48 hrs post-transfection for each experiment. The cellular compartments where each gene product has been demonstrated to function are indicated. The **green shading** indicates the 29 differentially expressed genes (Fig. 3C, SI Table S3) found by intersecting the SIN3A DsiRNA array, miR-138 mimic array, and the CFTR-Associated Gene Network. **Orange shading** indicates the 52 differentially expressed genes (Fig. 3C, SI Table S3) identified by intersecting the SIN3A DsiRNA array and the CFTR-Associated gene network. The **blue shading** denotes the 44 differentially expressed genes (Fig. 3C, SI Table S3) found by intersecting the miR-138 mimic array and the CFTR-Associated Gene Network. A literature survey identified that several of the differentially expressed gene products are known to influence CFTR protein biogenesis (references indicated). The microarray data are available from Genbank (accession no. XXXX).

| Gene Symbol | SCR vs SIN3A DsiRNA in Calu-3 cells |          |             |                          | SCR vs miR-138 mimic in Calu-3 cells |         |             |                           | Cellular compartment (29-31) | Evidence supporting a role in CFTR biogenesis         |
|-------------|-------------------------------------|----------|-------------|--------------------------|--------------------------------------|---------|-------------|---------------------------|------------------------------|-------------------------------------------------------|
|             | P value                             | q-value  | Fold change | Description              | P value                              | q-value | Fold change | Description               |                              |                                                       |
| AHSA1       | 1.61E-05                            | 0.012531 | -3.46199    | SCR down vs SIN3A DsiRNA | 0.019687                             | 0.25731 | -1.35164    | SCR down vs miR-138 mimic | ER                           | Wang et al., 2006 (27)                                |
| AIFM1       | 0.0070715                           | 0.15756  | -1.25746    | SCR down vs SIN3A DsiRNA | 0.67482                              | 0.77136 | -1.01677    | SCR down vs miR-138 mimic | Mitochondria                 |                                                       |
| AMFR        | 0.074739                            | 0.34891  | -1.11304    | SCR down vs SIN3A DsiRNA | 0.029462                             | 0.30129 | -1.1743     | SCR down vs miR-138 mimic | ER                           | Okiyoneda et al., 2010 (16), Morito et al., 2008 (32) |
| ANO1        | 0.66474                             | 0.6452   | 1.04484     | SCR up vs SIN3A DsiRNA   | 0.018091                             | 0.25129 | -1.13876    | SCR down vs miR-138 mimic | Cell membrane/               |                                                       |

|          |            |           |          |                          |            |          |          |                           |                         |                                                          |
|----------|------------|-----------|----------|--------------------------|------------|----------|----------|---------------------------|-------------------------|----------------------------------------------------------|
|          |            |           |          |                          |            |          |          |                           | Cytoplasm               |                                                          |
| ARF4     | 1.08E-07   | 0.0011043 | 11.2179  | SCR up vs SIN3A DsiRNA   | 0.0026934  | 0.13638  | 2.14856  | SCR up vs miR-138 mimic   | Cytoplasm               |                                                          |
| ARIH1    | 0.00030289 | 0.052976  | -1.50153 | SCR down vs SIN3A DsiRNA | 0.018203   | 0.25141  | -1.22173 | SCR down vs miR-138 mimic | ER                      |                                                          |
| ATP2A2   | 0.45985    | 0.57562   | -1.04296 | SCR down vs SIN3A DsiRNA | 4.01E-05   | 0.04964  | -3.28909 | SCR down vs miR-138 mimic | Membrane (ER)           |                                                          |
| ATP6V1A  | 0.086870   | 0.36266   | 1.28326  | SCR up vs SIN3A DsiRNA   | 0.023873   | 0.27584  | 1.37665  | SCR up vs miR-138 mimic   | Cytoplasm               | Gomes-Alves et al., 2009 (28)                            |
| C6orf48  | 0.79852    | 0.68491   | -1.01529 | SCR down vs SIN3A DsiRNA | 0.00094879 | 0.10264  | -1.43339 | SCR down vs miR-138 mimic |                         |                                                          |
| CALU     | 0.0013256  | 0.082494  | -1.85796 | SCR down vs SIN3A DsiRNA | 0.40333    | 0.68516  | -1.11166 | SCR down vs miR-138 mimic | ER                      | Gomes-Alves et al., 2010 (33), Riordan, 2008 (34)        |
| CANX     | 2.48E-05   | 0.015913  | 2.48084  | SCR up vs SIN3A DsiRNA   | 0.00027294 | 0.082131 | -3.9665  | SCR down vs miR-138 mimic | Membrane (ER)           | Okiyoneda et al., 2002 (35), 2004 (36) Amaral, 2005 (37) |
| CAPNS1   | 0.00030013 | 0.052919  | 1.62708  | SCR up vs SIN3A DsiRNA   | 0.011601   | 0.21325  | 1.50522  | SCR up vs miR-138 mimic   | Cytoplasm/Cell membrane | Averna et al., 2011 (38)                                 |
| CAPRI N1 | 0.021636   | 0.24574   | -1.38596 | SCR down vs SIN3A DsiRNA | 0.32374    | 0.65203  | -1.06328 | SCR down vs miR-138 mimic | Cytoplasm/membrane      |                                                          |
| CBL      | 0.00073926 | 0.067941  | -1.52704 | SCR down vs SIN3A DsiRNA | 0.21810    | 0.58825  | -1.10291 | SCR down vs miR-138 mimic | Cytoplasm               |                                                          |

|            |               |          |          |                             |                 |          |           |                              |                            |                                  |
|------------|---------------|----------|----------|-----------------------------|-----------------|----------|-----------|------------------------------|----------------------------|----------------------------------|
| CCT3       | 0.007984<br>5 | 0.16647  | 1.06435  | SCR up vs SIN3A<br>DsiRNA   | 0.084007        | 0.43743  | -1.05837  | SCR down vs<br>miR-138 mimic | Cytoplasm                  | Xu et al.,<br>2006 (39)          |
| CCT4       | 0.17258       | 0.43754  | -1.11454 | SCR down vs<br>SIN3A DsiRNA | 0.035947        | 0.32257  | 1.13169   | SCR up vs miR-<br>138 mimic  | Cytoplasm                  | Xu et al.,<br>2006 (39)          |
| CD36       | 0.001262<br>7 | 0.081077 | 1.26071  | SCR up vs SIN3A<br>DsiRNA   | 0.008396<br>4   | 0.19056  | -1.30301  | SCR down vs<br>miR-138 mimic | Membrane                   |                                  |
| CD46       | 0.018465      | 0.23255  | 1.15585  | SCR up vs SIN3A<br>DsiRNA   | 0.018579        | 0.25287  | 1.2212    | SCR up vs miR-<br>138 mimic  | Cytoplasm                  |                                  |
| CD59       | 0.008347<br>9 | 0.16854  | -1.19037 | SCR down vs<br>SIN3A DsiRNA | 0.071639<br>9   | 0.41259  | 1.10033   | SCR up vs miR-<br>138 mimic  | Cell<br>membrane           |                                  |
| CDH1       | 0.047676      | 0.30860  | 1.09583  | SCR up vs SIN3A<br>DsiRNA   | 0.000527<br>555 | 0.100395 | 1.61882   | SCR up vs miR-<br>138 mimic  | Cell<br>membrane           |                                  |
| CEP17<br>0 | 0.024747      | 0.25831  | -2.0017  | SCR down vs<br>SIN3A DsiRNA | 0.466766        | 0.70748  | 1.10426   | SCR up vs miR-<br>138 mimic  | Cytoplasm                  |                                  |
| CFL1       | 0.001197<br>8 | 0.079843 | -1.1756  | SCR down vs<br>SIN3A DsiRNA | 0.124343        | 0.49675  | 1.09421   | SCR up vs miR-<br>138 mimic  | Nucleus/<br>Cytoplasm      |                                  |
| CFTR       | 0.012744      | 0.19932  | -1.50046 | SCR down vs<br>SIN3A DsiRNA | 0.035462<br>5   | 0.219467 | -1.612486 | SCR down vs<br>miR-138 mimic | Cell<br>membrane           |                                  |
| CLINT<br>1 | 0.002119<br>0 | 0.097838 | -1.36507 | SCR down vs<br>SIN3A DsiRNA | 0.107882        | 0.47518  | -1.1829   | SCR down vs<br>miR-138 mimic | Cytoplasm/<br>Membrane     |                                  |
| COPB1      | 0.024636      | 0.25831  | -1.47584 | SCR down vs<br>SIN3A DsiRNA | 0.069575<br>2   | 0.41045  | -1.16536  | SCR down vs<br>miR-138 mimic | Cytoplasm/<br>Golgi        | Rennolds<br>et al., 2008<br>(40) |
| COPB2      | 0.023437      | 0.25289  | -1.19889 | SCR down vs<br>SIN3A DsiRNA | 0.689709        | 0.77324  | -1.01608  | SCR down vs<br>miR-138 mimic | Cytoplasm/<br>Golgi        | Rennolds<br>et al., 2008<br>(40) |
| CSTB       | 0.65516       | 0.64286  | 1.02048  | SCR up vs SIN3A<br>DsiRNA   | 0.016966<br>9   | 0.24604  | -1.09972  | SCR down vs<br>miR-138 mimic | Cytoplasm/<br>Nucleus      |                                  |
| CYB5B      | 0.58292       | 0.61947  | -1.0426  | SCR down vs<br>SIN3A DsiRNA | 0.004115<br>35  | 0.14967  | 1.195     | SCR up vs miR-<br>138 mimic  | Mitochondri<br>a           |                                  |
| DAB2       | 0.001534<br>3 | 0.08668  | -1.79223 | SCR down vs<br>SIN3A DsiRNA | 0.642821        | 0.76236  | -1.03643  | SCR down vs<br>miR-138 mimic | Cytoplasmic<br>vesicle/mem | Fu et al.,<br>2011 (41)          |

|            |                |          |          |                             |                 |         |          |                              |                                   |                                   |
|------------|----------------|----------|----------|-----------------------------|-----------------|---------|----------|------------------------------|-----------------------------------|-----------------------------------|
|            |                |          |          |                             |                 |         |          |                              | brane                             |                                   |
| DERL1      | 0.004885<br>2  | 0.13571  | 1.38671  | SCR up vs SIN3A<br>DsiRNA   | 0.005425<br>43  | 0.16414 | 1.34459  | SCR up vs miR-<br>138 mimic  | ER                                | Sun et al.,<br>2006 (42)          |
| DNAJ<br>A1 | 0.018151       | 0.23045  | 1.1753   | SCR up vs SIN3A<br>DsiRNA   | 0.287928        | 0.62985 | 1.12332  | SCR up vs miR-<br>138 mimic  | Membrane(<br>ER/Mitochon<br>dria) | Okiyoneda<br>et al., 2010<br>(16) |
| DNAJ<br>A2 | 0.17775        | 0.44117  | -1.27386 | SCR down vs<br>SIN3A DsiRNA | 0.014411<br>2   | 0.23249 | -1.35192 | SCR down vs<br>miR-138 mimic | Membrane(<br>ER/Mitochon<br>dria) |                                   |
| DNAJB<br>1 | 0.00467        | 0.13345  | -1.3115  | SCR down vs<br>SIN3A DsiRNA | 0.006207<br>12  | 0.17200 | -1.20906 | SCR down vs<br>miR-138 mimic | Cytoplasm/<br>Nucleus             | Loo et al.,<br>1998 (43)          |
| DNAJB<br>2 | 0.005474<br>5  | 0.14277  | -1.14103 | SCR down vs<br>SIN3A DsiRNA | 0.003973<br>51  | 0.14944 | -1.29637 | SCR down vs<br>miR-138 mimic | ER                                | Okiyoneda<br>et al., 2010<br>(16) |
| DNAJB<br>4 | 0.93405        | 0.71790  | 1.0126   | SCR up vs SIN3A<br>DsiRNA   | 0.000600<br>954 | 0.10160 | -1.69113 | SCR down vs<br>miR-138 mimic | Cytoplasm/<br>Cell<br>membrane    |                                   |
| DNAJB<br>5 | 0.04355        | 0.30481  | -1.16062 | SCR down vs<br>SIN3A DsiRNA | 0.67625         | 0.77136 | 1.03618  | SCR up vs miR-<br>138 mimic  | ER/cytoplas<br>m                  |                                   |
| DNAJC<br>3 | 0.017765       | 0.22786  | 1.18253  | SCR up vs SIN3A<br>DsiRNA   | 0.34254         | 0.663   | 1.06795  | SCR up vs miR-<br>138 mimic  | ER                                |                                   |
| DNAJC<br>5 | 0.021354       | 0.24515  | -1.12525 | SCR down vs<br>SIN3A DsiRNA | 0.61081         | 0.75450 | -1.03939 | SCR down vs<br>miR-138 mimic | ER                                |                                   |
| DPYSL<br>2 | 0.000310<br>12 | 0.052976 | 1.34553  | SCR up vs SIN3A<br>DsiRNA   | 0.82731         | 0.80259 | -1.0083  | SCR down vs<br>miR-138 mimic | Cytoplasm                         |                                   |
| DTL        | 0.000300<br>13 | 0.052919 | 1.62708  | SCR up vs SIN3A<br>DsiRNA   | 0.011601        | 0.21325 | 1.50522  | SCR up vs miR-<br>138 mimic  | Nucleus                           |                                   |
| ERBB2      | 0.72939        | 0.66475  | -1.02232 | SCR down vs<br>SIN3A DsiRNA | 0.023092        | 0.27238 | 1.10719  | SCR up vs miR-<br>138 mimic  | Cell<br>membrane                  |                                   |
| EXO1       | 0.047676       | 0.30860  | 1.09583  | SCR up vs SIN3A<br>DsiRNA   | 0.000527<br>55  | 0.10039 | 1.61882  | SCR up vs miR-<br>138 mimic  | Nucleus                           |                                   |
| FN1        | 0.55651        | 0.61078  | 1.10482  | SCR up vs SIN3A             | 0.047750        | 0.35996 | -1.13802 | SCR down vs                  | Secreted                          |                                   |

|           |           |          |          | DsiRNA                   |            |         |          | miR-138 mimic             |                 |                             |
|-----------|-----------|----------|----------|--------------------------|------------|---------|----------|---------------------------|-----------------|-----------------------------|
| GNAI2     | 0.095517  | 0.37214  | -1.13811 | SCR down vs SIN3A DsiRNA | 0.019199   | 0.25553 | 1.31869  | SCR up vs miR-138 mimic   | Membrane        |                             |
| GNB2L1    | 0.0019162 | 0.094827 | -1.19676 | SCR down vs SIN3A DsiRNA | 0.0048052  | 0.15668 | 1.08993  | SCR up vs miR-138 mimic   | Cell membrane   |                             |
| HAX1      | 0.020490  | 0.24207  | -1.09439 | SCR down vs SIN3A DsiRNA | 0.036990   | 0.32615 | -1.10308 | SCR down vs miR-138 mimic | Mitochondria/ER |                             |
| HSP90AA5P | 0.46371   | 0.57693  | -1.02053 | SCR down vs SIN3A DsiRNA | 0.004368   | 0.15289 | 1.13076  | SCR up vs miR-138 mimic   | Cytoplasm       |                             |
| HSP90AB1  | 0.0070715 | 0.15756  | -1.25746 | SCR down vs SIN3A DsiRNA | 0.67482    | 0.77136 | -1.01677 | SCR down vs miR-138 mimic | Cytoplasm       |                             |
| HSP90AB4P | 0.0036006 | 0.12180  | 1.29349  | SCR up vs SIN3A DsiRNA   | 0.024902   | 0.28152 | 1.20176  | SCR up vs miR-138 mimic   | Cytoplasm/ER    |                             |
| HSP90B1   | 0.019716  | 0.23852  | -1.15306 | SCR down vs SIN3A DsiRNA | 0.30453    | 0.64101 | -1.02907 | SCR down vs miR-138 mimic | ER              |                             |
| HSPA1A    | 0.36764   | 0.53808  | 1.03534  | SCR up vs SIN3A DsiRNA   | 0.0066991  | 0.17773 | -1.13272 | SCR down vs miR-138 mimic | Cytoplasm       | McLellan et al., 2005 (44)  |
| HSPA1B    | 0.52318   | 0.59986  | -1.02916 | SCR down vs SIN3A DsiRNA | 0.035042   | 0.31871 | -1.22484 | SCR down vs miR-138 mimic | ER              |                             |
| HSPA5     | 0.0012627 | 0.081077 | 1.26071  | SCR up vs SIN3A DsiRNA   | 0.00839647 | 0.19056 | -1.30301 | SCR down vs miR-138 mimic | ER              | Okiyoneda et al., 2010 (16) |
| HSPA8     | 0.022036  | 0.46597  | 1.03953  | SCR up vs SIN3A DsiRNA   | 0.032877   | 0.65556 | 1.02613  | SCR up vs miR-138 mimic   | ER              | Okiyoneda et al., 2010 (16) |
| HSPH1     | 0.11651   | 0.39757  | 1.10934  | SCR up vs SIN3A DsiRNA   | 0.036447   | 0.32411 | 1.0568   | SCR up vs miR-138 mimic   | ER              |                             |
| IFI44     | 0.0033295 | 0.11829  | -1.4303  | SCR down vs SIN3A DsiRNA | 0.0036995  | 0.14818 | -1.17785 | SCR down vs miR-138 mimic | Cytoplasm       |                             |
| IL8       | 0.0012508 | 0.081077 | -1.53641 | SCR down vs SIN3A DsiRNA | 0.27813    | 0.62365 | -1.0325  | SCR down vs miR-138 mimic | Secreted        |                             |



|        |           |          |          |                          |           |         |          |                           |                                |                             |
|--------|-----------|----------|----------|--------------------------|-----------|---------|----------|---------------------------|--------------------------------|-----------------------------|
| IPO7   | 0.021893  | 0.24628  | -1.28697 | SCR down vs SIN3A DsiRNA | 0.66865   | 0.76925 | -1.05573 | SCR down vs miR-138 mimic | Cytoplasm/<br>Nucleus          |                             |
| IPO9   | 0.41550   | 0.55856  | 1.08217  | SCR up vs SIN3A DsiRNA   | 0.010336  | 0.20386 | 1.30339  | SCR up vs miR-138 mimic   | Nucleus                        |                             |
| KIF2A  | 0.0012508 | 0.081077 | -1.53641 | SCR down vs SIN3A DsiRNA | 0.27813   | 0.62365 | -1.0325  | SCR down vs miR-138 mimic | Cytoplasm                      |                             |
| KIF3A  | 0.019187  | 0.23603  | -1.69424 | SCR down vs SIN3A DsiRNA | 0.020133  | 0.25813 | -1.66333 | SCR down vs miR-138 mimic | Cytoplasm                      |                             |
| KLC1   | 0.022475  | 0.24879  | -1.23103 | SCR down vs SIN3A DsiRNA | 0.27821   | 0.62367 | -1.03394 | SCR down vs miR-138 mimic | Cytoplasm                      |                             |
| LIN7C  | 0.029554  | 0.27188  | -1.39075 | SCR down vs SIN3A DsiRNA | 0.023080  | 0.27238 | -1.29217 | SCR down vs miR-138 mimic | Cell Membrane                  |                             |
| MARCF3 | 0.18840   | 0.44829  | 1.10157  | SCR up vs SIN3A DsiRNA   | 0.039927  | 0.33565 | 1.45175  | SCR up vs miR-138 mimic   | Membrane (ER, lysosome)        |                             |
| MARCF5 | 0.027520  | 0.26590  | -1.20855 | SCR down vs SIN3A DsiRNA | 0.046874  | 0.35684 | -1.32176 | SCR down vs miR-138 mimic | Membrane (Golgi)               |                             |
| MARCF8 | 0.38424   | 0.54441  | 1.08064  | SCR up vs SIN3A DsiRNA   | 0.0089270 | 0.19551 | -1.26098 | SCR down vs miR-138 mimic | Cytoplasmic vesicle membrane   |                             |
| MARCF9 | 0.65156   | 0.64193  | -1.01764 | SCR down vs SIN3A DsiRNA | 0.015383  | 0.23694 | 1.14263  | SCR up vs miR-138 mimic   | Membrane (ER, golgi, lysosome) |                             |
| MDM2   | 0.018896  | 0.23422  | 1.47227  | SCR up vs SIN3A DsiRNA   | 0.88957   | 0.81411 | 1.00671  | SCR up vs miR-138 mimic   | ER                             | Okiyoneda et al., 2010 (16) |
| MUC13  | 0.029923  | 0.27280  | 1.27671  | SCR up vs SIN3A DsiRNA   | 0.17301   | 0.55199 | -1.1594  | SCR down vs miR-138 mimic | Cell membrane/<br>Secreted     |                             |
| NEDD4  | 0.15355   | 0.42657  | -1.27145 | SCR down vs SIN3A DsiRNA | 0.0041411 | 0.14972 | -1.57035 | SCR down vs miR-138 mimic | Cytoplasm/<br>Cell membrane    | Caohuy et al., 2009 (45)    |

|             |                |          |          |                             |               |         |          |                              |                                        |                                   |
|-------------|----------------|----------|----------|-----------------------------|---------------|---------|----------|------------------------------|----------------------------------------|-----------------------------------|
| NPEPP<br>S  | 0.030349       | 0.27328  | -1.17896 | SCR down vs<br>SIN3A DsiRNA | 0.90233       | 0.81740 | 1.00816  | SCR up vs miR-<br>138 mimic  | Cytoplasm/<br>Nucleus                  |                                   |
| PARK7       | 0.055616       | 0.32245  | -1.17228 | SCR down vs<br>SIN3A DsiRNA | 0.032157      | 0.31007 | 1.07313  | SCR up vs miR-<br>138 mimic  | Cytoplasm/<br>Nucleus/Mit<br>ochondria | Okiyoneda<br>et al., 2010<br>(16) |
| PCMT1       | 0.027334       | 0.26525  | 1.22867  | SCR up vs SIN3A<br>DsiRNA   | 0.016646      | 0.24379 | 1.25673  | SCR up vs miR-<br>138 mimic  | Cytoplasm                              |                                   |
| PPP2C<br>A  | 0.041791       | 0.30057  | -1.15391 | SCR down vs<br>SIN3A DsiRNA | 0.073160      | 0.41682 | -1.08823 | SCR down vs<br>miR-138 mimic | Cytoplasm/<br>Nucleus                  |                                   |
| PPP2C<br>B  | 0.000739<br>26 | 0.067941 | -1.52704 | SCR down vs<br>SIN3A DsiRNA | 0.21810       | 0.58825 | -1.10291 | SCR down vs<br>miR-138 mimic | Cytoplasm/<br>Nucleus                  |                                   |
| PPP2R<br>1B | 0.084944       | 0.36119  | -1.04208 | SCR down vs<br>SIN3A DsiRNA | 0.034627      | 0.31765 | -1.10104 | SCR down vs<br>miR-138 mimic | Cytoplasm/<br>Nucleus                  |                                   |
| PRKA<br>B1  | 0.15856        | 0.42881  | -1.08675 | SCR down vs<br>SIN3A DsiRNA | 0.009871<br>7 | 0.20080 | -1.15418 | SCR down vs<br>miR-138 mimic | Cytoplasm/<br>mitochondri<br>a         |                                   |
| PRKA<br>R2A | 0.025070       | 0.25881  | 1.14948  | SCR up vs SIN3A<br>DsiRNA   | 0.97208       | 0.82740 | 1.00223  | SCR up vs miR-<br>138 mimic  | ER/Golgi/<br>Cytoplasm                 |                                   |
| PRKD<br>C   | 0.46658        | 0.57825  | 1.0732   | SCR up vs SIN3A<br>DsiRNA   | 0.009871<br>7 | 0.20080 | 1.4406   | SCR up vs miR-<br>138 mimic  | Cytoplasm                              |                                   |
| PSAP        | 0.044940       | 0.30552  | -1.04209 | SCR down vs<br>SIN3A DsiRNA | 0.11333       | 0.48211 | -1.06961 | SCR down vs<br>miR-138 mimic | Lysosome                               |                                   |
| PSENE<br>N  | 0.024242       | 0.25718  | 1.18026  | SCR up vs SIN3A<br>DsiRNA   | 0.11785       | 0.48791 | -1.06725 | SCR down vs<br>miR-138 mimic | Membrane<br>(ER/Golgi)                 |                                   |
| PSMA2       | 0.00255        | 0.10497  | -1.33197 | SCR down vs<br>SIN3A DsiRNA | 0.095343      | 0.45602 | -1.14552 | SCR down vs<br>miR-138 mimic | Cytoplasm                              |                                   |
| PSMB1       | 0.033826       | 0.28015  | -1.17517 | SCR down vs<br>SIN3A DsiRNA | 0.062900      | 0.39729 | -1.1133  | SCR down vs<br>miR-138 mimic | Cytoplasm                              |                                   |
| PSMB3       | 0.041791       | 0.30057  | -1.15391 | SCR down vs<br>SIN3A DsiRNA | 0.073160      | 0.41682 | -1.08823 | SCR down vs<br>miR-138 mimic | Cytoplasm                              |                                   |
| PSMB4       | 0.019716       | 0.23852  | -1.15306 | SCR down vs<br>SIN3A DsiRNA | 0.30453       | 0.64101 | -1.02907 | SCR down vs<br>miR-138 mimic | Cytoplasm                              | Gomes-<br>Alves et                |

|            |                |          |          |                             |                |         |          |                              |                                      |                                         |
|------------|----------------|----------|----------|-----------------------------|----------------|---------|----------|------------------------------|--------------------------------------|-----------------------------------------|
|            |                |          |          |                             |                |         |          |                              |                                      | al., 2009<br>(28)                       |
| PSMC4      | 0.26540        | 0.49093  | -1.05373 | SCR down vs<br>SIN3A DsiRNA | 0.001237<br>9  | 0.11199 | -1.2333  | SCR down vs<br>miR-138 mimic | Cytoplasm                            |                                         |
| PSMD2      | 0.27936        | 0.49685  | -1.03903 | SCR down vs<br>SIN3A DsiRNA | 0.000934<br>37 | 0.10264 | -1.22995 | SCR down vs<br>miR-138 mimic | Cytoplasm                            |                                         |
| PSME2      | 0.003861<br>6  | 0.12311  | -1.28234 | SCR down vs<br>SIN3A DsiRNA | 0.037191       | 0.32615 | -1.05329 | SCR down vs<br>miR-138 mimic | Cytoplasm                            | Gomes-<br>Alves et<br>al., 2010<br>(33) |
| RANB<br>P1 | 0.067280       | 0.33849  | -1.14645 | SCR down vs<br>SIN3A DsiRNA | 0.009867<br>8  | 0.20080 | 1.17892  | SCR up vs miR-<br>138 mimic  | Nucleus/<br>Cytoplasm                |                                         |
| RCN1       | 0.000464<br>17 | 0.059638 | 1.532    | SCR up vs SIN3A<br>DsiRNA   | 0.91037        | 0.81870 | -1.00768 | SCR down vs<br>miR-138 mimic | ER                                   | Riordan,<br>2008 (34)                   |
| RCN2       | 0.54208        | 0.60607  | 1.07129  | SCR up vs SIN3A<br>DsiRNA   | 0.004451<br>9  | 0.15405 | 1.51937  | SCR up vs miR-<br>138 mimic  | ER                                   | Riordan,<br>2008 (34)                   |
| RNF12<br>8 | 0.009978<br>3  | 0.18386  | 1.29054  | SCR up vs SIN3A<br>DsiRNA   | 0.089316       | 0.44584 | 1.24366  | SCR up vs miR-<br>138 mimic  | Endosome<br>membrane                 |                                         |
| RNF5       | 0.001483<br>2  | 0.086337 | -1.23699 | SCR down vs<br>SIN3A DsiRNA | 0.59021        | 0.74898 | -1.02225 | SCR down vs<br>miR-138 mimic | Membrane/<br>ER/<br>Mitochondri<br>a |                                         |
| RPS27<br>A | 0.014817       | 0.20962  | 1.16618  | SCR up vs SIN3A<br>DsiRNA   | 0.019903       | 0.25736 | -1.07778 | SCR down vs<br>miR-138 mimic | Ubiquitin:<br>Cytoplasm/<br>Nucleus  |                                         |
| RUVB<br>L1 | 0.031107       | 0.27492  | -1.27252 | SCR down vs<br>SIN3A DsiRNA | 0.95679        | 0.82533 | -1.00192 | SCR down vs<br>miR-138 mimic | Nucleus                              |                                         |
| RUVB<br>L2 | 0.012273       | 0.19621  | -1.25677 | SCR down vs<br>SIN3A DsiRNA | 0.74289        | 0.78593 | -1.01715 | SCR down vs<br>miR-138 mimic | Nucleus                              |                                         |
| S100A<br>6 | 0.10278        | 0.38125  | -1.03031 | SCR down vs<br>SIN3A DsiRNA | 0.040501       | 0.33761 | -1.07952 | SCR down vs<br>miR-138 mimic | Nucleus/<br>Cytoplasm                |                                         |
| SAR1B      | 0.001534       | 0.086681 | -1.79223 | SCR down vs                 | 0.64282        | 0.76236 | -1.03643 | SCR down vs                  | ER/Golgi                             | Yoo et al.,                             |

|          |             |           |          |                          |            |         |          |                           |                                           |                                   |
|----------|-------------|-----------|----------|--------------------------|------------|---------|----------|---------------------------|-------------------------------------------|-----------------------------------|
|          | 3           |           |          | SIN3A DsiRNA             |            |         |          | miR-138 mimic             |                                           | 2002 (46)                         |
| SEC31    | 0.014295    | 0.20631   | -1.2903  | SCR down vs SIN3A DsiRNA | 0.36154    | 0.66781 | 1.10972  | SCR up vs miR-138 mimic   | Cytoplasm/<br>Cytoplasmic vesicle         | Wang et al., 2004 (47), 2008 (48) |
| SEPT3    | 0.13198     | 0.41184   | -1.2196  | SCR down vs SIN3A DsiRNA | 0.0058464  | 0.16771 | 1.14975  | SCR up vs miR-138 mimic   | Cytoplasm                                 |                                   |
| SERP1    | 0.14214     | 0.41838   | -1.08846 | SCR down vs SIN3A DsiRNA | 0.044318   | 0.34845 | 1.07253  | SCR up vs miR-138 mimic   | Membrane (ER)                             | Yamaguchi et al., 1999 (49)       |
| SH3BGR12 | 0.00078009  | 0.069200  | 1.27715  | SCR up vs SIN3A DsiRNA   | 0.36493    | 0.66974 | 1.05099  | SCR up vs miR-138 mimic   | Nucleus                                   |                                   |
| SHROOM3  | 0.82982     | 0.692961  | -1.01069 | SCR down vs SIN3A DsiRNA | 0.037189   | 0.32615 | -1.12975 | SCR down vs miR-138 mimic | Cell junction/<br>Cytoplasm               |                                   |
| SIN3A    | 0.000000108 | 0.0011043 | 11.2179  | SCR up vs SIN3A DsiRNA   | 0.0026934  | 0.13638 | 2.14856  | SCR up vs miR-138 mimic   | Nucleus                                   |                                   |
| SLC9A2   | 0.54112     | 0.60556   | 1.05547  | SCR up vs SIN3A DsiRNA   | 0.0070906  | 0.18068 | 1.41754  | SCR up vs miR-138 mimic   | Cell membrane                             |                                   |
| SLC9A3R1 | 0.068323    | 0.3399    | -1.08533 | SCR down vs SIN3A DsiRNA | 0.00049357 | 0.10039 | 1.26929  | SCR up vs miR-138 mimic   | Cytoplasm/<br>Membrane protein            |                                   |
| SQRDL    | 0.017185    | 0.22378   | -1.22939 | SCR down vs SIN3A DsiRNA | 0.14380    | 0.51993 | -1.12326 | SCR down vs miR-138 mimic | Mitochondria                              |                                   |
| ST13     | 0.005976    | 0.14845   | -1.43969 | SCR down vs SIN3A DsiRNA | 0.35391    | 0.66668 | 1.05662  | SCR up vs miR-138 mimic   | Cytoplasm                                 |                                   |
| STIP1    | 0.030615    | 0.27442   | -1.13552 | SCR down vs SIN3A DsiRNA | 0.97796    | 0.82787 | 1.00179  | SCR up vs miR-138 mimic   | Cytoplasm/<br>Nucleus                     | Okiyoneda et al., 2010 (16)       |
| STX1A    | 0.95643     | 0.72231   | -1.00117 | SCR down vs SIN3A DsiRNA | 0.049094   | 0.36341 | -1.14888 | SCR down vs miR-138 mimic | Cytoplasmic vesicle/<br>Secretory vesicle |                                   |

|            |               |         |          |                             |               |         |          |                              |                                              |                                   |
|------------|---------------|---------|----------|-----------------------------|---------------|---------|----------|------------------------------|----------------------------------------------|-----------------------------------|
| TCEB1      | 0.034431      | 0.28246 | -1.11742 | SCR down vs<br>SIN3A DsiRNA | 0.23671       | 0.59940 | -1.05385 | SCR down vs<br>miR-138 mimic | Nucleus                                      |                                   |
| TCEB2      | 0.026312      | 0.26185 | -1.12125 | SCR down vs<br>SIN3A DsiRNA | 0.12352       | 0.49601 | 1.04679  | SCR up vs miR-<br>138 mimic  | Nucleus                                      |                                   |
| TMEM<br>43 | 0.022158      | 0.24720 | -1.21214 | SCR down vs<br>SIN3A DsiRNA | 0.33573       | 0.65964 | -1.06038 | SCR down vs<br>miR-138 mimic | Nucleus                                      |                                   |
| TMOD<br>3  | 0.051722      | 0.31560 | -1.38236 | SCR down vs<br>SIN3A DsiRNA | 0.037506      | 0.32671 | -1.19026 | SCR down vs<br>miR-138 mimic | Cytoplasm                                    |                                   |
| TPM3       | 0.024909      | 0.25857 | -1.10305 | SCR down vs<br>SIN3A DsiRNA | 0.20200       | 0.57531 | -1.06587 | SCR down vs<br>miR-138 mimic |                                              |                                   |
| TPT1       | 0.056163      | 0.32308 | -1.06789 | SCR down vs<br>SIN3A DsiRNA | 0.037114      | 0.32615 | -1.08914 | SCR down vs<br>miR-138 mimic | Cytoplasm                                    |                                   |
| TRIM2      | 0.033826      | 0.28015 | -1.17517 | SCR down vs<br>SIN3A DsiRNA | 0.062900      | 0.39729 | -1.1133  | SCR down vs<br>miR-138 mimic | Cytoplasm                                    |                                   |
| TTLL5      | 0.11181       | 0.39142 | -1.08133 | SCR down vs<br>SIN3A DsiRNA | 0.001865<br>2 | 0.12288 | 1.29484  | SCR up vs miR-<br>138 mimic  | Cell<br>projection/<br>Nucleus/<br>Cytoplasm |                                   |
| UBC        | 0.004673<br>0 | 0.13345 | -1.31157 | SCR down vs<br>SIN3A DsiRNA | 0.006207<br>1 | 0.17200 | -1.20906 | SCR down vs<br>miR-138 mimic | ER                                           | Younger et<br>al., 2004<br>(50)   |
| UBE2D<br>1 | 0.34893       | 0.53116 | -1.06745 | SCR down vs<br>SIN3A DsiRNA | 0.038136      | 0.32951 | -1.19781 | SCR down vs<br>miR-138 mimic | Cytoplasm                                    | Okiyoneda<br>et al., 2010<br>(16) |
| UBE2E<br>1 | 0.011802      | 0.19535 | 1.29504  | SCR up vs SIN3A<br>DsiRNA   | 0.91496       | 0.81920 | 1.00367  | SCR up vs miR-<br>138 mimic  | Nucleus                                      |                                   |
| UBE2N      | 0.27748       | 0.49605 | 1.16888  | SCR up vs SIN3A<br>DsiRNA   | 0.017948      | 0.25036 | -1.19433 | SCR down vs<br>miR-138 mimic | Nucleus/<br>Cytoplasm                        | Okiyoneda<br>et al., 2010<br>(16) |
| UBE4B      | 0.41550       | 0.55856 | 1.08217  | SCR up vs SIN3A<br>DsiRNA   | 0.010336      | 0.20386 | 1.30339  | SCR up vs miR-<br>138 mimic  | Cytoplasm                                    | Okiyoneda<br>et al., 2010<br>(16) |

|       |               |         |          |                             |               |         |          |                              |                       |  |
|-------|---------------|---------|----------|-----------------------------|---------------|---------|----------|------------------------------|-----------------------|--|
| VPS4B | 0.006423<br>4 | 0.15287 | -1.33358 | SCR down vs<br>SIN3A DsiRNA | 0.003864<br>0 | 0.14931 | -1.28937 | SCR down vs<br>miR-138 mimic | Endosome<br>membrane  |  |
| XPO1  | 0.88937       | 0.70679 | -1.01945 | SCR down vs<br>SIN3A DsiRNA | 0.006847<br>9 | 0.17867 | 1.36536  | SCR up vs miR-<br>138 mimic  | Cytoplasm/<br>Nucleus |  |

**Table S5. Gene Ontology enrichment of genes co-regulated in Calu-3 cells following miR-138 mimic or SIN3A DsiRNA treatment**

The 773 differentially expressed genes (Fig. 3C) found by intersecting the SIN3A DsiRNA array and the miR-138 mimic array, were subject to ‘functional annotation clustering’ using The Database for Annotation, Visualization and Integrated Discovery (DAVID)(51). Presented here are the top 15 enrichment clusters identified with a FDR <0.1. Each cluster is accompanied with the following information: enrichment score for the cluster, the number of genes, fold enrichment, and FDR.

| Cluster  | Term                                                                  | # of genes | Fold Enrichment | FDR     |
|----------|-----------------------------------------------------------------------|------------|-----------------|---------|
| <b>1</b> | <b>Enrichment Score: 6.373714295309155</b>                            |            |                 |         |
|          | Chaperone                                                             | 32         | 4.60            | 2.6E-09 |
|          | GO:0051082~unfolded protein binding                                   | 26         | 4.80            | 1.4E-07 |
|          | GO:0006457~protein folding                                            | 29         | 3.39            | 4.5E-05 |
|          | GO:0031072~heat shock protein binding                                 | 16         | 4.59            | 2.2E-03 |
|          | IPR015609:Molecular chaperone, heat shock protein, Hsp40, DnaJ        | 12         | 6.30            | 2.9E-03 |
|          | SM00271:DnaJ                                                          | 12         | 5.67            | 7.0E-03 |
|          | domain:J                                                              | 12         | 5.54            | 1.3E-02 |
|          | IPR001623:Heat shock protein DnaJ, N-terminal                         | 12         | 5.38            | 1.5E-02 |
|          | IPR018253:Heat shock protein DnaJ, conserved site                     | 12         | 5.27            | 1.9E-02 |
|          | IPR002939:Chaperone DnaJ, C-terminal                                  | 6          | 14.35           | 3.7E-02 |
|          |                                                                       |            |                 |         |
| <b>2</b> | <b>Enrichment Score: 6.25938918306378</b>                             |            |                 |         |
|          | GO:0051789~response to protein stimulus                               | 25         | 4.84            | 3.3E-07 |
|          | GO:0006986~response to unfolded protein                               | 20         | 5.84            | 1.1E-06 |
|          | GO:0006984~ER-nuclear signaling pathway                               | 12         | 7.10            | 7.7E-04 |
|          | GO:0034976~response to endoplasmic reticulum stress                   | 11         | 6.70            | 5.2E-03 |
|          | GO:0034620~cellular response to unfolded protein                      | 9          | 8.88            | 5.8E-03 |
|          | GO:0030968~endoplasmic reticulum unfolded protein response            | 9          | 8.88            | 5.8E-03 |
|          |                                                                       |            |                 |         |
| <b>3</b> | <b>Enrichment Score: 5.500411858307561</b>                            |            |                 |         |
|          | endoplasmic reticulum                                                 | 64         | 2.04            | 1.5E-04 |
|          | GO:0005783~endoplasmic reticulum                                      | 81         | 1.77            | 7.4E-04 |
|          |                                                                       |            |                 |         |
| <b>4</b> | <b>Enrichment Score: 4.989968351059494</b>                            |            |                 |         |
|          | GO:0043161~proteasomal ubiquitin-dependent protein catabolic process  | 20         | 4.06            | 6.1E-04 |
|          | GO:0010498~proteasomal protein catabolic process                      | 20         | 4.06            | 6.1E-04 |
|          | GO:0044265~cellular macromolecule catabolic process                   | 65         | 1.86            | 3.2E-03 |
|          | GO:0051603~proteolysis involved in cellular protein catabolic process | 56         | 1.93            | 5.5E-03 |
|          | GO:0044257~cellular protein catabolic process                         | 56         | 1.92            | 6.5E-03 |
|          | GO:0030163~protein catabolic process                                  | 57         | 1.90            | 7.9E-03 |
|          | GO:0009057~macromolecule catabolic process                            | 67         | 1.78            | 9.3E-03 |
|          | GO:0006511~ubiquitin-dependent protein catabolic process              | 30         | 2.57            | 9.9E-03 |

|          |                                                                                                           |    |      |         |
|----------|-----------------------------------------------------------------------------------------------------------|----|------|---------|
|          | GO:0043632~modification-dependent macromolecule catabolic process                                         | 53 | 1.91 | 1.4E-02 |
|          | GO:0019941~modification-dependent protein catabolic process                                               | 53 | 1.91 | 1.4E-02 |
|          |                                                                                                           |    |      |         |
| <b>5</b> | <b>Enrichment Score: 4.675699610419189</b>                                                                |    |      |         |
|          | GO:0043161~proteasomal ubiquitin-dependent protein catabolic process                                      | 20 | 4.06 | 6.1E-04 |
|          | GO:0010498~proteasomal protein catabolic process                                                          | 20 | 4.06 | 6.1E-04 |
|          | GO:0031396~regulation of protein ubiquitination                                                           | 19 | 3.94 | 2.1E-03 |
|          | GO:0051340~regulation of ligase activity                                                                  | 17 | 4.35 | 2.3E-03 |
|          | GO:0051351~positive regulation of ligase activity                                                         | 16 | 4.54 | 2.9E-03 |
|          | GO:0031397~negative regulation of protein ubiquitination                                                  | 16 | 4.48 | 3.5E-03 |
|          | GO:0051436~negative regulation of ubiquitin-protein ligase activity during mitotic cell cycle             | 15 | 4.78 | 3.5E-03 |
|          | GO:0031145~anaphase-promoting complex-dependent proteasomal ubiquitin-dependent protein catabolic process | 15 | 4.78 | 3.5E-03 |
|          | GO:0051444~negative regulation of ubiquitin-protein ligase activity                                       | 15 | 4.64 | 5.2E-03 |
|          | GO:0051352~negative regulation of ligase activity                                                         | 15 | 4.64 | 5.2E-03 |
|          | GO:0051438~regulation of ubiquitin-protein ligase activity                                                | 16 | 4.25 | 6.9E-03 |
|          | GO:0051443~positive regulation of ubiquitin-protein ligase activity                                       | 15 | 4.44 | 8.9E-03 |
|          | GO:0044092~negative regulation of molecular function                                                      | 37 | 2.29 | 9.1E-03 |
|          | GO:0006511~ubiquitin-dependent protein catabolic process                                                  | 30 | 2.57 | 9.9E-03 |
|          | GO:0051439~regulation of ubiquitin-protein ligase activity during mitotic cell cycle                      | 15 | 4.38 | 1.1E-02 |
|          | GO:0051247~positive regulation of protein metabolic process                                               | 30 | 2.56 | 1.1E-02 |
|          | GO:0031398~positive regulation of protein ubiquitination                                                  | 16 | 3.95 | 1.8E-02 |
|          | GO:0031400~negative regulation of protein modification process                                            | 19 | 3.31 | 2.7E-02 |
|          | GO:0051437~positive regulation of ubiquitin-protein ligase activity during mitotic cell cycle             | 14 | 4.27 | 3.2E-02 |
|          | GO:0032270~positive regulation of cellular protein metabolic process                                      | 28 | 2.49 | 3.8E-02 |
|          | GO:0043086~negative regulation of catalytic activity                                                      | 31 | 2.32 | 5.1E-02 |
|          | GO:0000278~mitotic cell cycle                                                                             | 37 | 2.07 | 8.5E-02 |
|          | GO:0032268~regulation of cellular protein metabolic process                                               | 44 | 1.92 | 8.6E-02 |
|          | GO:0032269~negative regulation of cellular protein metabolic process                                      | 23 | 2.65 | 9.8E-02 |
|          |                                                                                                           |    |      |         |
| <b>6</b> | <b>Enrichment Score: 4.445439726104499</b>                                                                |    |      |         |
|          | GO:0043067~regulation of programmed cell death                                                            | 75 | 1.91 | 1.2E-04 |
|          | GO:0010941~regulation of cell death                                                                       | 75 | 1.91 | 1.4E-04 |
|          | GO:0042981~regulation of apoptosis                                                                        | 74 | 1.91 | 1.8E-04 |
|          | GO:0043066~negative regulation of apoptosis                                                               | 41 | 2.40 | 8.1E-04 |
|          | GO:0043069~negative regulation of programmed cell death                                                   | 41 | 2.37 | 1.2E-03 |
|          | GO:0060548~negative regulation of cell death                                                              | 41 | 2.36 | 1.3E-03 |
|          | GO:0006916~anti-apoptosis                                                                                 | 26 | 2.61 | 3.5E-02 |



|           |                                                         |     |       |         |
|-----------|---------------------------------------------------------|-----|-------|---------|
| <b>7</b>  | <b>Enrichment Score: 3.800565305189148</b>              |     |       |         |
|           | GO:0043233~organelle lumen                              | 125 | 1.44  | 2.3E-02 |
|           | GO:0070013~intracellular organelle lumen                | 122 | 1.43  | 3.3E-02 |
|           | GO:0031974~membrane-enclosed lumen                      | 126 | 1.42  | 3.6E-02 |
| <b>8</b>  | <b>Enrichment Score: 3.7639457515427486</b>             |     |       |         |
|           | nucleotide-binding                                      | 120 | 1.62  | 1.8E-04 |
|           | GO:0032553~ribonucleotide binding                       | 123 | 1.42  | 4.7E-02 |
|           | GO:0032555~purine ribonucleotide binding                | 123 | 1.42  | 4.7E-02 |
|           | GO:0017076~purine nucleotide binding                    | 127 | 1.41  | 5.6E-02 |
|           | GO:0000166~nucleotide binding                           | 144 | 1.36  | 7.0E-02 |
|           | atp-binding                                             | 89  | 1.53  | 9.1E-02 |
| <b>9</b>  | <b>Enrichment Score: 3.5376428280629657</b>             |     |       |         |
|           | GO:0033554~cellular response to stress                  | 54  | 1.98  | 4.5E-03 |
|           | GO:0006974~response to DNA damage stimulus              | 39  | 2.17  | 1.9E-02 |
| <b>10</b> | <b>Enrichment Score: 3.3100660934321877</b>             |     |       |         |
|           | GO:0043232~intracellular non-membrane-bounded organelle | 166 | 1.34  | 3.6E-02 |
|           | GO:0043228~non-membrane-bounded organelle               | 166 | 1.34  | 3.6E-02 |
| <b>11</b> | <b>Enrichment Score: 3.196277550756004</b>              |     |       |         |
|           | GO:0044427~chromosomal part                             | 39  | 2.11  | 2.6E-02 |
|           | GO:0005694~chromosome                                   | 43  | 1.96  | 5.8E-02 |
| <b>12</b> | <b>Enrichment Score: 3.0026983971129426</b>             |     |       |         |
|           | GO:0046907~intracellular transport                      | 58  | 1.83  | 2.0E-02 |
|           | GO:0006886~intracellular protein transport              | 38  | 2.10  | 4.7E-02 |
|           | GO:0034613~cellular protein localization                | 40  | 2.02  | 7.2E-02 |
|           | GO:0045184~establishment of protein localization        | 63  | 1.70  | 7.7E-02 |
|           | GO:0070727~cellular macromolecule localization          | 40  | 2.00  | 8.5E-02 |
| <b>13</b> | <b>Enrichment Score: 2.7917083841293207</b>             |     |       |         |
|           | GO:0010033~response to organic substance                | 67  | 1.93  | 5.8E-04 |
| <b>14</b> | <b>Enrichment Score: 2.648776861425179</b>              |     |       |         |
|           | IPR002939:Chaperone DnaJ, C-terminal                    | 6   | 14.35 | 3.7E-02 |
| <b>15</b> | <b>Enrichment Score: 2.041439746344019</b>              |     |       |         |
|           | GO:0007049~cell cycle                                   | 73  | 1.95  | 9.2E-05 |

|  |                               |    |      |         |
|--|-------------------------------|----|------|---------|
|  | GO:0022402~cell cycle process | 57 | 2.09 | 3.7E-04 |
|  | GO:0000278~mitotic cell cycle | 37 | 2.07 | 8.5E-02 |
